# Supplementary material for: The overlap syndrome of urticaria and gastroesophageal reflux disease
Source: PLoS One. 2018 Nov 20;13(11):e0207602. doi: 10.1371/journal.pone.0207602 (PMC6245739; doi:10.1371/journal.pone.0207602)
Supplement: S1 Dataset — Legend symbols: GERD = gastroesophageal reflux disease; EBC = Eosinophils blood count; Tot IgE = serum total IgE level; HP = Helicobacter Pylori infection; *URT-DUR = duration of urticaria (weeks); **GERD-DUR = duration of gastroesophageal reflux disease before urticaria onset (months); UAS7 = urticaria activity score according to UAS7; IBS = irritable bowel syndrome; ***Clinical diagnoses: ASU = acute spontaneous urticaria; CSU = chronic spontaneous urticaria; acute/chronic UGOS = acute/chronic Urticaria and GERD Overlap Syndrome; IBD = inflammatory bowel diseases; ****Endoscopic study: endoscopy/bioptic data of GERD according to Los Angeles Classification (L.A.)–grade A, B, C, D (L.A. A/B/C/D); NERD = Non erosive disease; S-BE = Short-Barrett’s esophagus; bioptic data of celiac disease (CD) according to the modified Marsh–Oberhuber classification–type 1–4 (Marsh 1–4). (XLSX) [file pone.0207602.s001.xlsx]

## Sheet: Sheet1
#	Sex	Age	Spontanaous urticaria	GERD	EBC/mmc	Tot IgE	HP	URT-DUR*	GERD-DUR**	UAS7	IBS	Dyspepsia	Further GICs	Clinical	Endoscopic
	Male/Female	(years)	Yes= 1; No=0	Yes= 1; No=0		IU/mL	pos=1; neg=0	(weeks)	(months)		Yes= 1; No=0	Yes= 1; No=0	Yes= 1; No=0	diagnoses***	study****
1	M	36	1 - acute	0	67	48	0	2	-	18	0	0	0	ASU	not performed
2	F	41	1 - acute	0	70	59	0	1.5	-	18	0	0	0	ASU	not performed
3	F	34	1 - acute	0	70	115	0	2	-	24	0	0	0	ASU	not performed
4	F	42	1 - acute	0	89	90	0	2	-	21	0	0	0	ASU	not performed
5	F	34	1 - acute	0	90	60	0	1.5	-	16	0	0	0	ASU	not performed
6	F	36	1 - acute	0	90	79	1	2	-	18	0	0	0	ASU	not performed
7	F	49	1 - acute	0	90	125	0	1.5	-	20	0	0	0	ASU	not performed
8	F	39	1 - acute	0	90	130	1	2	-	25	0	0	0	ASU	not performed
9	M	20	1 - acute	0	90	130	0	1.2	-	22	0	0	0	ASU	not performed
10	M	37	1 - acute	0	90	210	0	1	-	22	0	0	0	ASU	not performed
11	M	35	1 - acute	0	110	40	0	1.2	-	19	0	0	0	ASU	not performed
12	F	29	1 - acute	1	110	70	0	4	2	24	0	0	0	Acute UGOS	not performed
13	F	38	1 - acute	0	110	79	0	1.5	-	34	0	0	0	ASU	not performed
14	M	29	1 - acute	1	110	230	0	3	12	26	0	0	0	Acute UGOS	not performed
15	F	32	1 - acute	0	125	80	1	1.5	-	18	0	0	0	ASU	not performed
16	M	47	1 - acute	0	138	70	0	1.5	-	16	0	0	0	ASU	not performed
17	M	19	1 - acute	0	140	39	1	1.5	-	15	0	0	0	ASU	not performed
18	F	50	1 - acute	0	140	60	0	1.2	-	22	0	0	0	ASU	not performed
19	M	43	1 - acute	0	140	79	1	1	-	16	0	0	0	ASU	not performed
20	M	60	1 - acute	0	140	100	1	2	-	20	0	0	0	ASU	not performed
21	F	33	1 - acute	0	180	80	0	2	-	23	0	0	0	ASU	not performed
22	F	47	1 - acute	0	180	100	0	2	-	18	0	0	0	ASU	not performed
23	M	56	1 - acute	0	180	125	0	2	-	23	0	0	0	ASU	not performed
24	M	35	1 - acute	0	180	130	0	1.5	-	19	0	0	0	ASU	not performed
25	M	46	1 - acute	0	180	200	1	1	-	18	0	0	0	ASU	not performed
26	F	38	1 - acute	1	180	230	1	4	24	28	1	1	0	Acute UGOS	not performed
27	F	38	1 - acute	0	190	59	0	1	-	18	0	0	0	ASU	not performed
28	M	37	1 - acute	0	190	66	1	1.5	-	13	0	0	0	ASU	not performed
29	F	49	1 - acute	0	190	79	0	2	-	15	0	0	0	ASU	not performed
30	F	57	1 - acute	0	190	79	0	1.5	-	20	0	0	0	ASU	not performed
31	F	30	1 - acute	0	190	115	1	1.8	-	19	0	0	0	ASU	not performed
32	F	47	1 - acute	1	190	130	1	2	6	23	0	0	0	Acute UGOS	not performed
33	F	51	1 - acute	0	210	60	1	1	-	16	0	0	0	ASU	not performed
34	F	44	1 - acute	0	220	230	1	1.5	-	19	0	0	0	ASU	not performed
35	M	44	1 - acute	0	230	50	0	1.5	-	14	0	0	0	ASU	not performed
36	M	47	1 - acute	0	230	60	1	1	-	17	0	0	0	ASU	not performed
37	F	31	1 - acute	0	230	79	0	2	-	18	0	0	0	ASU	not performed
38	F	26	1 - acute	0	230	80	1	1.2	-	26	0	0	0	ASU	not performed
39	F	46	1 - acute	0	230	115	0	1.5	-	16	0	0	0	ASU	not performed
40	M	21	1 - acute	1	230	180	1	5	0.01	25	1	1	0	Acute UGOS	not performed
41	M	32	1 - acute	0	230	200	0	2	-	19	0	0	0	ASU	not performed
42	M	56	1 - acute	1	230	350	0	3	12	28	1	0	0	Acute UGOS	not performed
43	F	28	1 - acute	0	235	115	0	2	-	16	0	0	0	ASU	not performed
44	M	34	1 - acute	1	238	79	0	4	0.01	28	0	0	0	Acute UGOS	not performed
45	F	57	1 - acute	0	260	59	0	1.5	-	22	0	0	0	ASU	not performed
46	M	60	1 - acute	0	260	60	0	1.7	-	15	0	0	0	ASU	not performed
47	F	41	1 - acute	1	260	110	0	3	12	28	0	0	0	Acute UGOS	not performed
48	M	37	1 - acute	0	260	110	1	1.5	-	21	0	0	0	ASU	not performed
49	M	51	1 - acute	1	260	110	0	2.5	12	28	1	1	0	Acute UGOS	not performed
50	M	35	1 - acute	0	260	160	0	1.5	-	20	0	0	0	ASU	not performed
51	F	44	1 - acute	1	260	180	0	2.5	6	28	0	0	0	Acute UGOS	not performed
52	M	38	1 - acute	1	260	230	0	4	12	28	0	0	0	Acute UGOS	not performed
53	F	21	1 - acute	0	290	99	1	2	-	19	0	0	0	ASU	not performed
54	M	27	1 - acute	0	290	120	0	2	-	20	0	0	0	ASU	not performed
55	F	28	1 - acute	0	300	79	1	1.5	-	22	0	0	0	ASU	not performed
56	M	39	1 - acute	0	300	80	1	1	-	20	0	0	0	ASU	not performed
57	F	19	1 - acute	0	300	99	1	2	-	20	0	0	0	ASU	not performed
58	M	22	1 - acute	0	300	160	1	1.5	-	18	0	0	0	ASU	not performed
59	M	20	1 - acute	0	310	35	1	1.5	-	21	0	0	0	ASU	not performed
60	F	60	1 - acute	1	310	110	0	3	12	22	0	0	0	Acute UGOS	not performed
61	M	53	1 - acute	0	330	50	0	1.5	-	21	0	0	0	ASU	not performed
62	M	27	1 - acute	0	330	60	1	1.3	-	18	0	0	0	ASU	not performed
63	M	33	1 - acute	1	330	60	1	3	0.5	17	1	0	0	Acute UGOS	not performed
64	M	45	1 - acute	0	330	130	1	1.5	-	22	0	0	0	ASU	not performed
65	F	33	1 - acute	0	400	59	1	1.5	-	21	0	0	0	ASU	not performed
66	M	20	1 - acute	0	400	100	0	1.4	-	14	0	0	0	ASU	not performed
67	M	29	1 - acute	0	420	89	0	1.5	-	16	0	0	0	ASU	not performed
68	M	31	1 - acute	1	460	125	1	3	0.01	24	0	0	0	Acute UGOS	not performed
69	F	38	1 - acute	0	500	60	1	1	-	19	0	0	0	ASU	not performed
70	F	51	1 - acute	0	600	60	0	2	-	18	0	0	0	ASU	not performed
71	F	35	1 - acute	0	600	80	0	1.5	-	20	0	0	0	ASU	not performed
72	F	32	1 - chronic	0	70	59	0	10	-	12	1	1	0	CSU	not performed
73	F	53	1 - chronic	0	80	79	0	10	-	12	1	1	0	CSU	not performed
74	M	31	1 - chronic	0	90	89	1	12	-	13	1	0	0	CSU	not performed
75	M	35	1 - chronic	0	90	130	1	12	-	16	1	0	0	CSU	not performed
76	M	43	1 - chronic	0	110	95	0	24	-	18	1	0	0	CSU	not performed
77	M	21	1 - chronic	0	110	230	0	24	-	20	1	0	0	CSU	not performed
78	F	31	1 - chronic	0	125	80	1	10	-	12	0	1	0	CSU	not performed
79	M	44	1 - chronic	0	140	111	0	18	-	18	0	0	1 -celiac disease	CSU	CD Marsh 3
80	F	20	1 - chronic	0	156	79	1	14	-	20	0	0	0	CSU	not performed
81	F	29	1 - chronic	0	160	100	1	12	-	14	0	0	0	CSU	not performed
82	F	60	1 - chronic	0	170	230	0	24	-	19	0	0	0	CSU	not performed
83	M	32	1 - chronic	0	180	73	0	12	-	15	0	0	0	CSU	not performed
84	F	53	1 - chronic	0	180	125	0	30	-	22	0	0	0	CSU	not performed
85	F	47	1 - chronic	0	180	160	1	16	-	22	0	0	0	CSU	not performed
86	F	38	1 - chronic	0	190	79	0	16	-	15	0	0	0	CSU	not performed
87	M	38	1 - chronic	0	190	212	0	28	-	20	0	0	0	CSU	not performed
88	M	47	1 - chronic	0	230	115	0	18	-	20	0	0	0	CSU	not performed
89	F	22	1 - chronic	0	235	70	0	32	-	15	0	0	0	CSU	not performed
90	F	44	1 - chronic	0	235	115	1	24	-	20	0	0	0	CSU	not performed
91	F	36	1 - chronic	0	256	180	0	20	-	20	0	0	0	CSU	not performed
92	M	51	1 - chronic	0	260	56	1	26	-	20	0	0	0	CSU	not performed
93	M	49	1 - chronic	0	260	60	1	16	-	14	0	0	0	CSU	not performed
94	F	50	1 - chronic	0	260	110	0	24	-	23	0	0	0	CSU	not performed
95	F	44	1 - chronic	0	290	50	0	20	-	15	0	0	0	CSU	not performed
96	F	35	1 - chronic	0	300	70	0	16	-	12	0	0	0	CSU	not performed
97	F	45	1 - chronic	0	300	99	0	16	-	19	0	0	0	CSU	not performed
98	F	21	1 - chronic	0	320	50	0	20	-	13	0	0	0	CSU	not performed
99	M	32	1 - chronic	0	330	40	1	22	-	17	0	0	0	CSU	not performed
100	M	60	1 - chronic	0	330	60	0	14	-	14	0	0	0	CSU	not performed
101	F	49	1 - chronic	0	340	60	0	20	-	19	0	0	0	CSU	not performed
102	F	47	1 - chronic	0	400	60	0	22	-	18	0	0	0	CSU	not performed
103	M	38	1 - chronic	0	39	80	0	14	-	13.5	0	0	0	CSU	not performed
104	M	51	1 - chronic	0	40	18	0	13	-	13.5	0	0	0	CSU	not performed
105	M	34	1 - chronic	0	60	39	1	12	-	13	0	0	0	CSU	not performed
106	F	47	1 - chronic	0	65	18	0	12	-	10	0	0	0	CSU	not performed
107	F	45	1 - chronic	0	67	38	0	16	-	13.5	0	0	0	CSU	not performed
108	F	43	1 - chronic	0	78	65	0	20	-	12	0	0	0	CSU	not performed
109	M	39	1 - chronic	0	78	89	0	12	-	12.5	0	0	0	CSU	not performed
110	F	44	1 - chronic	0	120	44	1	24	-	16	0	0	0	CSU	not performed
111	M	35	1 - chronic	0	148	65	1	19	-	14	0	0	0	CSU	not performed
112	F	27	1 - chronic	0	160	23	1	19	-	12.5	0	0	0	CSU	not performed
113	F	32	1 - chronic	0	200	70	0	15	-	11	0	0	0	CSU	not performed
114	F	22	1 - chronic	0	220	37	0	23	-	14.5	0	0	0	CSU	not performed
115	F	45	1 - chronic	0	223	77	0	18	-	14	0	0	0	CSU	not performed
116	F	38	1 - chronic	0	230	40	1	18	-	14	0	0	0	CSU	not performed
117	F	37	1 - chronic	0	235	43	1	14	-	12.5	0	0	0	CSU	not performed
118	M	46	1 - chronic	0	300	56	0	17	-	15	0	0	0	CSU	not performed
119	F	53	1 - chronic	0	350	25	0	16	-	12.5	0	0	0	CSU	not performed
120	F	46	1 - chronic	0	358	38	0	16	-	13.5	0	0	0	CSU	not performed
121	F	35	1 - chronic	0	400	45	0	20	-	14	0	0	0	CSU	not performed
122	M	28	0	1	37	95	0	-	6	-	0	1	0	GERD	NERD
123	M	60	0	1	39	25	0	-	8	-	0	1	0	GERD	L.A. A
124	F	42	0	1	49	44	0	-	10	-	0	1	0	GERD	L.A. A
125	M	56	0	1	49	65	1	-	8	-	0	1	0	GERD	L.A. B
126	F	41	0	1	50	48	0	-	13	-	0	1	0	GERD	L.A. A
127	M	44	0	1	56	56	1	-	4	-	0	1	0	GERD	L.A. A
128	F	40	0	1	60	33	0	-	10	-	0	1	0	GERD	L.A. A
129	F	35	0	1	60	38	1	-	8	-	0	1	0	GERD	L.A. A
130	M	46	0	1	60	43	0	-	6	-	0	1	0	GERD	L.A. A
131	F	19	0	1	70	45	1	-	10	-	0	1	0	GERD	L.A. A
132	F	43	0	1	70	95	0	-	6	-	0	1	0	GERD	L.A. B
133	F	38	0	1	76	40	1	-	8	-	0	1	0	GERD	NERD
134	F	49	0	1	78	73	0	-	8	-	0	1	0	GERD	L.A. B
135	F	65	0	1	80	15	0	-	8	-	0	1	0	GERD	L.A. A
136	M	42	0	1	88	33	0	-	6	-	0	1	0	GERD	L.A. A
137	M	49	0	1	89	89	0	-	5	-	0	1	0	GERD	L.A. B
138	F	39	0	1	90	58	0	-	12	-	0	1	0	GERD	L.A. C
139	M	29	0	1	90	70	0	-	8	-	0	1	0	GERD	NERD
140	F	40	0	1	90	71	1	-	14	-	0	1	0	GERD	NERD
141	M	29	0	1	90	89	0	-	10	-	0	1	0	GERD	L.A. A
142	M	20	0	1	110	39	0	-	7	-	1	1	0	GERD	L.A. C
143	M	37	0	1	110	40	0	-	8	-	1	1	0	GERD	L.A. A
144	F	54	0	1	110	56	0	-	8	-	1	1	0	GERD	L.A. A
145	F	29	0	1	110	90	1	-	10	-	1	1	0	GERD	L.A. A
146	F	39	0	1	120	39	0	-	16	-	1	1	0	GERD	NERD
147	F	44	0	1	120	65	0	-	18	-	1	1	0	GERD	NERD
148	M	65	0	1	120	73	0	-	6	-	1	1	0	GERD	NERD
149	F	36	0	1	140	33	0	-	12	-	1	1	0	GERD	NERD
150	F	29	0	1	150	38	0	-	16	-	1	1	0	GERD	NERD
151	F	42	0	1	150	70	0	-	10	-	1	1	0	GERD	L.A. B
152	F	37	0	1	160	40	1	-	6	-	1	1	0	GERD	L.A. A
153	F	28	0	1	200	28	0	-	10	-	1	1	0	GERD	NERD
154	F	32	0	1	200	52	0	-	13	-	1	1	0	GERD	L.A. A
155	F	41	0	1	200	70	0	-	8	-	1	1	0	GERD	L.A. A
156	F	43	0	1	220	25	0	-	7	-	1	1	0	GERD	NERD
157	F	56	0	1	220	36	0	-	10	-	1	1	0	GERD	L.A. B
158	M	55	0	1	220	38	0	-	10	-	1	1	0	GERD	NERD
159	M	54	0	1	220	40	1	-	6	-	1	1	0	GERD	L.A. B
160	M	52	0	1	230	77	0	-	6	-	1	1	0	GERD	L.A. A
161	F	51	0	1	260	89	1	-	14	-	1	1	0	GERD	NERD
162	F	43	0	1	280	110	0	-	16	-	1	1	0	GERD	NERD
163	M	27	0	1	300	18	1	-	12	-	1	1	0	GERD	NERD
164	F	43	0	1	300	25	1	-	12	-	1	1	0	GERD	NERD
165	F	22	0	1	300	77	0	-	12	-	1	1	0	GERD	L.A. B
166	F	45	0	1	310	54	0	-	15	-	1	1	0	GERD	L.A. A
167	M	60	0	1	350	56	1	-	8	-	1	1	0	GERD	L.A. B
168	F	51	0	1	350	60	0	-	12	-	1	1	0	GERD	NERD
169	F	29	0	1	50	30	1	-	20	-	1	1	0	GERD	L.A. B
170	F	43	0	1	60	89	0	-	14	-	1	1	0	GERD	NERD
171	M	39	0	1	70	43	0	-	10	-	1	1	0	GERD	NERD
172	M	32	0	1	70	45	0	-	8	-	1	1	0	GERD	NERD
173	F	65	0	1	70	54	0	-	12	-	1	1	0	GERD	L.A. A
174	F	40	0	1	70	130	0	-	12	-	1	1	0	GERD	NERD
175	F	41	0	1	80	54	0	-	12	-	1	0	0	GERD	NERD
176	F	49	0	1	80	170	1	-	12	-	1	0	0	GERD	L.A. A
177	F	22	0	1	89	50	1	-	8	-	1	0	0	GERD	L.A. A
178	M	57	0	1	89	50	0	-	8	-	1	0	0	GERD	L.A. A
179	M	38	0	1	89	70	0	-	8	-	1	0	0	GERD	NERD
180	M	19	0	1	90	33	0	-	8	-	1	0	0	GERD	L.A. B
181	M	35	0	1	90	48	0	-	8	-	1	0	0	GERD	L.A. A
182	F	39	0	1	90	70	0	-	12	-	1	0	0	GERD	L.A. A
183	F	60	0	1	90	70	0	-	6	-	1	0	0	GERD	NERD
184	F	53	0	1	90	160	1	-	10	-	1	0	0	GERD	L.A. A
185	M	51	0	1	96	130	0	-	10	-	1	0	0	GERD	NERD
186	M	28	0	1	123	110	1	-	14	-	1	0	0	GERD	L.A. A
187	M	38	0	1	125	36	0	-	10	-	1	0	0	GERD	L.A. A
188	M	38	0	1	125	56	0	-	6	-	1	0	0	GERD	NERD
189	F	44	0	1	125	140	0	-	12	-	1	0	0	GERD	L.A. B
190	F	51	0	1	128	40	1	-	4	-	1	0	0	GERD	L.A. C
191	M	35	0	1	130	140	0	-	12	-	1	0	0	GERD	NERD
192	M	39	0	1	160	39	0	-	6	-	1	0	0	GERD	L.A. A
193	F	44	0	1	160	66	0	-	8	-	1	0	0	GERD	NERD
194	F	65	0	1	160	220	0	-	16	-	1	0	0	GERD	NERD
195	M	28	0	1	165	130	0	-	4	-	1	0	0	GERD	L.A. B
196	M	49	0	1	165	220	1	-	12	-	1	0	0	GERD	NERD
197	F	27	0	1	170	34	0	-	6	-	1	0	0	GERD	L.A. A
198	F	40	0	1	170	40	0	-	10	-	1	0	0	GERD	NERD
199	F	42	0	1	170	80	0	-	12	-	1	0	0	GERD	NERD
200	F	40	0	1	179	71	1	-	12	-	1	0	0	GERD	L.A. A
201	F	33	0	1	180	18	0	-	6	-	1	0	0	GERD	NERD
202	F	23	0	1	180	25	0	-	12	-	1	0	0	GERD	L.A. B
203	M	45	0	1	180	54	0	-	12	-	1	0	0	GERD	L.A. B
204	M	32	0	1	180	60	1	-	12	-	1	0	0	GERD	NERD
205	F	38	0	1	180	89	0	-	16	-	1	1	0	GERD	L.A. B
206	F	29	0	1	180	120	0	-	12	-	1	1	0	GERD	NERD
207	M	33	0	1	190	22	0	-	12	-	1	1	0	GERD	NERD
208	M	43	0	1	190	33	1	-	6	-	1	1	0	GERD	L.A. A
209	F	28	0	1	190	36	0	-	6	-	1	1	0	GERD	NERD
210	F	51	0	1	190	70	1	-	12	-	1	1	0	GERD	L.A. B
211	F	49	0	1	190	90	0	-	6	-	1	1	0	GERD	S-BE
212	F	45	0	1	200	45	1	-	6	-	1	1	0	GERD	NERD
213	F	34	0	1	210	110	0	-	14	-	1	1	0	GERD	NERD
214	M	47	0	1	210	160	0	-	14	-	1	1	0	GERD	L.A. A
215	F	43	0	1	213	130	0	-	16	-	0	0	0	GERD	L.A. B
216	M	27	0	1	220	45	0	-	10	-	0	0	0	GERD	L.A. B
217	F	49	0	1	220	48	0	-	7	-	0	0	0	GERD	L.A. B
218	M	34	0	1	220	71	0	-	8	-	0	0	0	GERD	NERD
219	F	35	0	1	230	56	1	-	8	-	0	0	0	GERD	L.A. A
220	M	34	0	1	234	140	1	-	12	-	0	0	0	GERD	L.A. A
221	F	45	0	1	235	54	1	-	12	-	0	0	0	GERD	L.A. A
222	M	44	0	1	235	60	1	-	12	-	0	0	0	GERD	NERD
223	F	43	0	1	235	130	0	-	10	-	0	0	0	GERD	L.A. A
224	F	54	0	1	238	60	1	-	8	-	0	0	0	GERD	L.A. A
225	M	37	0	1	240	70	0	-	12	-	0	0	0	GERD	NERD
226	F	50	0	1	250	39	0	-	6	-	0	0	0	GERD	L.A. A
227	M	60	0	1	256	150	1	-	16	-	0	0	0	GERD	S-BE
228	M	41	0	1	260	25	1	-	6	-	0	0	0	GERD	L.A. B
229	F	54	0	1	260	39	0	-	12	-	0	0	0	GERD	NERD
230	M	46	0	1	260	89	1	-	20	-	0	0	0	GERD	NERD
231	F	44	0	1	260	110	0	-	18	-	0	0	0	GERD	NERD
232	F	36	0	1	260	150	0	-	6	-	0	0	0	GERD	L.A. A
233	M	46	0	1	267	130	1	-	14	-	0	0	0	GERD	NERD
234	F	28	0	1	280	71	1	-	12	-	0	0	0	GERD	L.A. A
235	F	47	0	1	280	110	1	-	12	-	0	0	0	GERD	L.A. A
236	F	39	0	1	300	33	1	-	8	-	0	0	0	GERD	L.A. C
237	M	45	0	1	300	36	1	-	7	-	0	0	0	GERD	L.A. A
238	F	43	0	1	300	48	1	-	12	-	0	0	0	GERD	NERD
239	F	56	0	1	300	52	0	-	8	-	0	0	0	GERD	L.A. A
240	M	26	0	1	300	58	0	-	8	-	0	0	0	GERD	L.A. A
241	F	39	0	1	300	60	1	-	12	-	0	0	0	GERD	L.A. A
242	F	28	0	1	300	100	0	-	18	-	0	0	0	GERD	L.A. B
243	F	55	0	1	300	100	0	-	14	-	0	0	0	GERD	NERD
244	M	53	0	1	300	110	1	-	12	-	0	0	0	GERD	NERD
245	F	47	0	1	300	140	0	-	8	-	0	0	0	GERD	L.A. C
246	M	51	0	1	305	160	0	-	14	-	0	0	0	GERD	L.A. C
247	F	42	0	1	310	60	0	-	12	-	0	0	0	GERD	NERD
248	F	21	0	1	310	110	1	-	6	-	0	0	0	GERD	NERD
249	F	54	0	1	320	60	1	-	10	-	0	0	0	GERD	L.A. A
250	F	36	0	1	320	70	1	-	14	-	0	0	0	GERD	NERD
251	F	38	0	1	330	58	0	-	24	-	0	0	0	GERD	NERD
252	F	22	0	1	340	58	1	-	6	-	0	0	0	GERD	L.A. A
253	F	29	0	1	340	120	0	-	8	-	0	0	0	GERD	L.A. B
254	M	44	0	1	345	130	0	-	8	-	0	0	0	GERD	L.A. A
255	M	51	0	1	350	10	1	-	12	-	0	0	0	GERD	NERD
256	M	21	0	1	370	40	0	-	6	-	0	0	0	GERD	L.A. A
257	M	47	0	1	400	25	0	-	12	-	0	0	0	GERD	NERD
258	M	51	1 - chronic	1	280	200	1	14	12	22	1	0	0	Chronic UGOS	L.A. B
259	F	44	1 - chronic	1	350	70	1	40	24	22	1	0	0	Chronic UGOS	L.A. A
260	F	28	1 - chronic	1	360	60	1	13	10	28	1	0	0	Chronic UGOS	NERD
261	F	26	1 - chronic	1	510	170	1	10	6	24	1	0	0	Chronic UGOS	NERD
262	F	29	1 - chronic	1	330	230	0	28	18	21	1	0	0	Chronic UGOS	L.A. B
263	F	41	1 - chronic	1	330	230	0	12	13	21	1	0	0	Chronic UGOS	NERD
264	F	19	1 - chronic	1	410	140	1	12	6	23	1	0	0	Chronic UGOS	NERD
265	M	35	1 - chronic	1	420	180	0	12	7	18	0	0	0	Chronic UGOS	NERD
266	M	38	1 - chronic	1	350	140	1	19	16	23	0	0	0	Chronic UGOS	L.A. A
267	M	56	1 - chronic	1	370	220	0	20	24	25	0	0	0	Chronic UGOS	S-BE
268	F	36	1 - chronic	1	390	200	0	16	13	20	0	0	0	Chronic UGOS	NERD
269	F	35	1 - chronic	1	400	300	0	26	18	24	0	0	0	Chronic UGOS	NERD
270	F	47	1 - chronic	1	160	250	1	10	17	21	0	0	0	Chronic UGOS	NERD
271	F	20	1 - chronic	1	300	110	1	22	12	25	0	0	0	Chronic UGOS	L.A. B
272	F	39	1 - chronic	1	348	160	1	20	16	15	0	0	0	Chronic UGOS	L.A. A
273	F	34	1 - chronic	1	500	300	0	12	9	19	0	0	0	Chronic UGOS	L.A. A
274	M	47	1 - chronic	1	350	130	1	14	15	26	0	0	0	Chronic UGOS	NERD
275	F	27	1 - chronic	1	370	100	0	20	9	26	0	0	0	Chronic UGOS	NERD
276	M	20	1 - chronic	1	400	160	0	12	4	30	0	0	0	Chronic UGOS	NERD
277	F	21	1 - chronic	1	500	200	1	15	12	30	0	0	0	Chronic UGOS	NERD
278	M	46	1 - chronic	1	150	90	1	24	13	26	0	0	0	Chronic UGOS	NERD
279	F	50	1 - chronic	1	290	110	0	12	22	23	0	0	0	Chronic UGOS	NERD
280	F	41	1 - chronic	1	390	130	0	15	12	22	0	0	0	Chronic UGOS	NERD
281	F	47	1 - chronic	1	430	90	1	30	15	29	0	0	0	Chronic UGOS	NERD
282	F	22	1 - chronic	1	330	120	0	12	5	20	0	0	0	Chronic UGOS	L.A. B
283	M	29	1 - chronic	1	350	200	0	14	6	19	1	1	0	Chronic UGOS	NERD
284	M	50	1 - chronic	1	360	60	0	25	24	22	1	1	0	Chronic UGOS	NERD
285	F	60	1 - chronic	1	390	150	1	15	24	21	1	1	0	Chronic UGOS	L.A. A
286	M	33	1 - chronic	1	150	360	1	20	8	20	1	1	0	Chronic UGOS	L.A. A
287	F	43	1 - chronic	1	300	140	0	15	15	18	1	1	0	Chronic UGOS	NERD
288	M	46	1 - chronic	1	330	90	1	14	16	20	1	1	0	Chronic UGOS	NERD
289	F	44	1 - chronic	1	400	180	0	20	24	26	1	1	0	Chronic UGOS	NERD
290	F	29	1 - chronic	1	260	170	0	8	8	19	1	1	0	Chronic UGOS	L.A. A
291	F	46	1 - chronic	1	330	250	1	22	16	19	1	1	0	Chronic UGOS	L.A. B
292	F	28	1 - chronic	1	415	60	0	16	10	27	1	1	0	Chronic UGOS	L.A. B
293	F	33	1 - chronic	1	370	120	0	16	24	20	1	1	0	Chronic UGOS	NERD
294	F	35	1 - chronic	1	400	250	0	19	11	21	1	1	0	Chronic UGOS	NERD
295	F	51	1 - chronic	1	420	200	1	12	14	20	1	1	0	Chronic UGOS	NERD
296	F	49	1 - chronic	1	280	130	1	28	12	27	1	1	0	Chronic UGOS	L.A. A
297	F	47	1 - chronic	1	380	180	0	16	28	15	1	1	0	Chronic UGOS	NERD
298	M	30	1 - chronic	1	400	150	0	12	9	31	1	1	0	Chronic UGOS	L.A. A
299	M	27	1 - chronic	1	420	220	0	12	8	17	1	1	0	Chronic UGOS	NERD
300	F	53	1 - chronic	1	270	80	0	20	26	19	1	1	0	Chronic UGOS	NERD
301	M	45	1 - chronic	1	330	150	0	15	22	22	1	1	0	Chronic UGOS	S-BE
302	M	37	1 - chronic	1	390	150	0	15	12	16	1	1	0	Chronic UGOS	NERD
303	F	55	1 - chronic	1	410	50	0	22	36	27	1	1	0	Chronic UGOS	L.A. A
304	F	36	1 - chronic	1	210	150	1	24	16	29	1	1	0	Chronic UGOS	L.A. A
305	F	40	1 - chronic	1	280	130	0	16	15	24	1	1	0	Chronic UGOS	L.A. B
306	F	32	1 - chronic	1	330	140	1	16	12	31	1	1	0	Chronic UGOS	NERD
307	M	37	1 - chronic	1	410	60	0	15	9	17	1	1	0	Chronic UGOS	L.A. A
308	F	38	1 - chronic	1	280	220	1	18	15	19	1	1	0	Chronic UGOS	NERD
309	M	43	1 - chronic	1	350	110	0	12	18	16	1	1	0	Chronic UGOS	NERD
310	F	32	1 - chronic	1	370	150	0	16	12	24	1	1	0	Chronic UGOS	NERD
311	F	38	1 - chronic	1	190	40	0	14	12	25	1	1	0	Chronic UGOS	NERD
312	M	38	1 - chronic	1	290	110	0	16	14	18	1	1	0	Chronic UGOS	NERD
313	F	51	1 - chronic	1	310	370	1	28	15	29	1	1	0	Chronic UGOS	NERD
314	F	47	1 - chronic	1	150	170	0	24	18	22	1	1	0	Chronic UGOS	NERD
315	M	31	1 - chronic	1	230	150	1	18	10	23	1	1	0	Chronic UGOS	NERD
316	M	60	1 - chronic	1	300	70	0	16	14	23	1	1	0	Chronic UGOS	NERD
317	F	44	1 - chronic	1	310	160	0	12	30	16	1	1	0	Chronic UGOS	L.A. A
318	F	53	1 - chronic	1	210	330	1	20	24	20	1	1	0	Chronic UGOS	L.A. B
319	M	36	1 - chronic	1	390	70	0	26	18	30	1	1	0	Chronic UGOS	NERD
320	F	34	1 - chronic	1	405	100	0	24	8	29	1	1	0	Chronic UGOS	S-BE
321	F	22	1 - chronic	1	380	230	0	24	12	25	1	1	0	Chronic UGOS	L.A. B
322	F	39	1 - chronic	1	390	120	1	20	12	27	1	1	0	Chronic UGOS	NERD
323	F	38	1 - chronic	1	400	130	0	23	19	17	1	1	0	Chronic UGOS	L.A. A
324	F	25	1 - chronic	1	500	150	1	10	6	20	1	1	0	Chronic UGOS	NERD
325	F	45	1 - chronic	1	270	130	0	18	10	26	1	1	0	Chronic UGOS	NERD
326	F	29	1 - chronic	1	370	160	1	10	8	25	1	1	0	Chronic UGOS	NERD
327	F	57	1 - chronic	1	390	80	0	18	24	21	1	1	0	Chronic UGOS	L.A. B
328	F	58	0	0	180	55	not performed	-	-	-	1	0	0	Other GIC/s	not performed
329	F	49	0	0	150	48	not performed	-	-	-	1	0	0	Other GIC/s	not performed
330	F	30	0	0	100	33	not performed	-	-	-	1	0	0	Other GIC/s	not performed
331	M	39	0	0	75	25	not performed	-	-	-	1	0	0	Other GIC/s	not performed
332	M	38	0	0	80	88	not performed	-	-	-	1	0	0	Other GIC/s	not performed
333	F	22	0	0	152	75	not performed	-	-	-	1	0	0	Other GIC/s	not performed
334	F	18	0	0	140	90	not performed	-	-	-	1	0	0	Other GIC/s	not performed
335	M	22	0	0	98	115	not performed	-	-	-	1	0	0	Other GIC/s	IBS
336	F	43	0	0	77	150	not performed	-	-	-	1	0	0	Other GIC/s	not performed
337	F	44	0	0	51	44	not performed	-	-	-	1	0	0	Other GIC/s	not performed
338	M	37	0	0	37	30	not performed	-	-	-	1	0	0	Other GIC/s	not performed
339	M	36	0	0	300	51	not performed	-	-	-	1	0	0	Other GIC/s	IBS
340	M	58	0	0	40	48	not performed	-	-	-	1	0	0	Other GIC/s	not performed
341	F	51	0	0	45	47	not performed	-	-	-	1	0	0	Other GIC/s	not performed
342	M	44	0	0	400	30	not performed	-	-	-	1	0	0	Other GIC/s	not performed
343	F	22	0	0	80	65	not performed	-	-	-	1	0	0	Other GIC/s	not performed
344	F	21	0	0	74	70	not performed	-	-	-	1	0	0	Other GIC/s	not performed
345	F	49	0	0	88	90	not performed	-	-	-	1	0	0	Other GIC/s	not performed
346	F	19	0	0	340	75	not performed	-	-	-	1	0	0	Other GIC/s	not performed
347	F	33	0	0	95	60	not performed	-	-	-	1	0	0	Other GIC/s	not performed
348	F	36	0	0	280	25	not performed	-	-	-	1	0	0	Other GIC/s	not performed
349	M	47	0	0	70	100	not performed	-	-	-	1	0	0	Other GIC/s	not performed
350	M	44	0	0	88	125	not performed	-	-	-	1	0	0	Other GIC/s	not performed
351	F	33	0	0	100	220	not performed	-	-	-	1	0	0	Other GIC/s	not performed
352	M	61	0	0	75	80	not performed	-	-	-	1	0	0	Other GIC/s	IBS
353	F	21	0	0	150	95	not performed	-	-	-	1	0	0	Other GIC/s	not performed
354	M	41	0	0	175	115	not performed	-	-	-	1	0	0	Other GIC/s	not performed
355	F	34	0	0	250	40	not performed	-	-	-	1	0	0	Other GIC/s	not performed
356	F	40	0	0	125	70	1	-	-	-	0	1	0	Other GIC/s	functional dyspepsia
357	F	19	0	0	152	80	0	-	-	-	0	1	0	Other GIC/s	functional dyspepsia
358	M	22	0	0	155	55	0	-	-	-	0	1	0	Other GIC/s	functional dyspepsia
359	F	64	0	0	157	200	0	-	-	-	0	1	0	Other GIC/s	functional dyspepsia
360	M	43	0	0	140	75	1	-	-	-	0	1	0	Other GIC/s	gastritis
361	M	44	0	0	80	45	1	-	-	-	0	1	0	Other GIC/s	functional dyspepsia
362	M	58	0	0	370	35	0	-	-	-	0	1	0	Other GIC/s	functional dyspepsia
363	M	24	0	0	77	150	0	-	-	-	0	1	0	Other GIC/s	functional dyspepsia
364	M	48	0	0	58	55	0	-	-	-	0	1	0	Other GIC/s	functional dyspepsia
365	F	54	0	0	97	75	0	-	-	-	0	1	0	Other GIC/s	functional dyspepsia
366	M	29	0	0	98	95	0	-	-	-	0	1	0	Other GIC/s	functional dyspepsia
367	F	48	0	0	70	80	0	-	-	-	0	1	0	Other GIC/s	functional dyspepsia
368	M	47	0	0	100	125	0	-	-	-	0	1	0	Other GIC/s	functional dyspepsia
369	F	39	0	0	95	40	0	-	-	-	0	1	0	Other GIC/s	functional dyspepsia
370	F	40	0	0	88	55	0	-	-	-	0	1	0	Other GIC/s	functional dyspepsia
371	M	32	0	0	75	68	0	-	-	-	0	1	0	Other GIC/s	functional dyspepsia
372	F	39	0	0	80	125	1	-	-	-	0	1	0	Other GIC/s	functional dyspepsia
373	M	39	0	0	85	50	0	-	-	-	0	1	0	Other GIC/s	functional dyspepsia
374	F	35	0	0	90	110	1	-	-	-	0	1	0	Other GIC/s	peptic ulcer
375	F	38	0	0	330	68	0	-	-	-	0	1	0	Other GIC/s	functional dyspepsia
376	F	48	0	0	90	40	0	-	-	-	0	1	0	Other GIC/s	functional dyspepsia
377	F	47	0	0	80	35	0	-	-	-	0	1	0	Other GIC/s	functional dyspepsia
378	F	63	0	0	400	60	1	-	-	-	0	1	0	Other GIC/s	gastritis
379	F	26	0	0	325	75	0	-	-	-	0	1	0	Other GIC/s	functional dyspepsia
380	F	47	0	0	380	70	0	-	-	-	0	1	0	Other GIC/s	functional dyspepsia
381	F	44	0	0	270	60	0	-	-	-	0	1	0	Other GIC/s	functional dyspepsia
382	F	38	0	0	180	35	0	-	-	-	0	1	0	Other GIC/s	functional dyspepsia
383	M	41	0	0	40	90	0	-	-	-	0	1	0	Other GIC/s	functional dyspepsia
384	M	55	0	0	330	110	0	-	-	-	0	1	0	Other GIC/s	functional dyspepsia
385	M	61	0	0	80	55	1	-	-	-	0	1	0	Other GIC/s	gastritis
386	M	52	0	0	70	60	0	-	-	-	0	1	0	Other GIC/s	functional dyspepsia
387	F	46	0	0	80	35	0	-	-	-	0	1	0	Other GIC/s	functional dyspepsia
388	M	38	0	0	90	45	1	-	-	-	0	1	0	Other GIC/s	functional dyspepsia
389	F	29	0	0	40	40	0	-	-	-	0	1	0	Other GIC/s	functional dyspepsia
390	F	34	0	0	80	80	0	-	-	-	0	1	0	Other GIC/s	functional dyspepsia
391	M	41	0	0	93	30	1	-	-	-	1	1	0	Other GIC/s	functional dyspepsia
392	F	39	0	0	101	70	1	-	-	-	1	1	0	Other GIC/s	gastritis
393	M	38	0	0	118	75	0	-	-	-	1	1	0	Other GIC/s	functional dyspepsia
394	F	44	0	0	137	100	0	-	-	-	1	1	0	Other GIC/s	functional dyspepsia
395	F	58	0	0	120	80	0	-	-	-	1	1	0	Other GIC/s	gastritis
396	M	61	0	0	60	70	0	-	-	-	1	1	0	Other GIC/s	functional dyspepsia
397	M	43	0	0	235	55	0	-	-	-	1	1	0	Other GIC/s	functional dyspepsia
398	F	44	0	0	80	75	0	-	-	-	1	1	0	Other GIC/s	functional dyspepsia
399	M	50	0	0	110	78	1	-	-	-	1	1	0	Other GIC/s	peptic ulcer
400	F	51	0	0	38	50	0	-	-	-	1	1	0	Other GIC/s	functional dyspepsia
401	F	19	0	0	85	40	not performed	-	-	-	0	0	1 - IBD	Other GIC/s	IBD
402	F	21	0	0	115	55	not performed	-	-	-	0	0	1 - IBD	Other GIC/s	IBD
403	F	22	0	0	95	60	not performed	-	-	-	0	0	1 - IBD	Other GIC/s	IBD
404	M	28	0	0	210	85	not performed	-	-	-	0	0	1 - IBD	Other GIC/s	IBD
405	F	31	0	0	300	70	not performed	-	-	-	0	0	1 - IBD	Other GIC/s	IBD
406	M	34	0	0	88	45	not performed	-	-	-	0	0	1 - IBD	Other GIC/s	IBD
407	M	41	0	0	90	50	not performed	-	-	-	0	0	1 - IBD	Other GIC/s	IBD
408	F	44	0	0	75	90	not performed	-	-	-	0	0	1 - IBD	Other GIC/s	IBD
409	F	39	0	0	270	60	not performed	-	-	-	0	0	1 - IBD	Other GIC/s	IBD
410	M	27	0	0	97	45	not performed	-	-	-	0	0	1 - IBD	Other GIC/s	IBD
411	F	21	0	0	60	70	0	-	-	-	0	0	1 - celiac disease	Other GIC/s	CD Marsh 3
412	F	18	0	0	98	90	0	-	-	-	0	0	1 - celiac disease	Other GIC/s	CD Marsh 4
413	M	23	0	0	180	110	0	-	-	-	0	0	1 - celiac disease	Other GIC/s	CD Marsh 3
414	F	25	0	0	88	40	0	-	-	-	0	0	1 - celiac disease	Other GIC/s	CD Marsh 3
415	F	22	0	0	115	50	0	-	-	-	0	0	1 - celiac disease	Other GIC/s	CD Marsh 3
416	M	33	0	0	120	75	0	-	-	-	0	0	1 - celiac disease	Other GIC/s	CD Marsh 4
417	F	59	0	0	90	25	not performed	-	-	-	0	0	1 - gallstone	Other GIC/s	not performed
418	M	44	0	0	71	30	not performed	-	-	-	0	0	1 - diverticulosis	Other GIC/s	Diverticulosis
419	F	37	0	0	350	35	not performed	-	-	-	0	0	1 - Eosinophilic colitis	Other GIC/s	Eosinophilic colitis
420	Disesase/s different from spontaneous urticaria or gastrointestinal complaints (GICs) or diseases secondary to parasites/infections other than HP/ drug hypersensitivity
421	Disesase/s different from spontaneous urticaria or gastrointestinal complaints (GICs) or diseases secondary to parasites/infections other than HP/ drug hypersensitivity
422	Disesase/s different from spontaneous urticaria or gastrointestinal complaints (GICs) or diseases secondary to parasites/infections other than HP/ drug hypersensitivity
423	Disesase/s different from spontaneous urticaria or gastrointestinal complaints (GICs) or diseases secondary to parasites/infections other than HP/ drug hypersensitivity
424	Disesase/s different from spontaneous urticaria or gastrointestinal complaints (GICs) or diseases secondary to parasites/infections other than HP/ drug hypersensitivity
425	Disesase/s different from spontaneous urticaria or gastrointestinal complaints (GICs) or diseases secondary to parasites/infections other than HP/ drug hypersensitivity
426	Disesase/s different from spontaneous urticaria or gastrointestinal complaints (GICs) or diseases secondary to parasites/infections other than HP/ drug hypersensitivity
427	Disesase/s different from spontaneous urticaria or gastrointestinal complaints (GICs) or diseases secondary to parasites/infections other than HP/ drug hypersensitivity
428	Disesase/s different from spontaneous urticaria or gastrointestinal complaints (GICs) or diseases secondary to parasites/infections other than HP/ drug hypersensitivity
429	Disesase/s different from spontaneous urticaria or gastrointestinal complaints (GICs) or diseases secondary to parasites/infections other than HP/ drug hypersensitivity
430	Disesase/s different from spontaneous urticaria or gastrointestinal complaints (GICs) or diseases secondary to parasites/infections other than HP/ drug hypersensitivity
431	Disesase/s different from spontaneous urticaria or gastrointestinal complaints (GICs) or diseases secondary to parasites/infections other than HP/ drug hypersensitivity
432	Disesase/s different from spontaneous urticaria or gastrointestinal complaints (GICs) or diseases secondary to parasites/infections other than HP/ drug hypersensitivity
433	Disesase/s different from spontaneous urticaria or gastrointestinal complaints (GICs) or diseases secondary to parasites/infections other than HP/ drug hypersensitivity
434	Disesase/s different from spontaneous urticaria or gastrointestinal complaints (GICs) or diseases secondary to parasites/infections other than HP/ drug hypersensitivity
435	Disesase/s different from spontaneous urticaria or gastrointestinal complaints (GICs) or diseases secondary to parasites/infections other than HP/ drug hypersensitivity
436	Disesase/s different from spontaneous urticaria or gastrointestinal complaints (GICs) or diseases secondary to parasites/infections other than HP/ drug hypersensitivity
437	Disesase/s different from spontaneous urticaria or gastrointestinal complaints (GICs) or diseases secondary to parasites/infections other than HP/ drug hypersensitivity
438	Disesase/s different from spontaneous urticaria or gastrointestinal complaints (GICs) or diseases secondary to parasites/infections other than HP/ drug hypersensitivity
439	Disesase/s different from spontaneous urticaria or gastrointestinal complaints (GICs) or diseases secondary to parasites/infections other than HP/ drug hypersensitivity
440	Disesase/s different from spontaneous urticaria or gastrointestinal complaints (GICs) or diseases secondary to parasites/infections other than HP/ drug hypersensitivity
441	Disesase/s different from spontaneous urticaria or gastrointestinal complaints (GICs) or diseases secondary to parasites/infections other than HP/ drug hypersensitivity
442	Disesase/s different from spontaneous urticaria or gastrointestinal complaints (GICs) or diseases secondary to parasites/infections other than HP/ drug hypersensitivity
443	Disesase/s different from spontaneous urticaria or gastrointestinal complaints (GICs) or diseases secondary to parasites/infections other than HP/ drug hypersensitivity
444	Disesase/s different from spontaneous urticaria or gastrointestinal complaints (GICs) or diseases secondary to parasites/infections other than HP/ drug hypersensitivity
445	Disesase/s different from spontaneous urticaria or gastrointestinal complaints (GICs) or diseases secondary to parasites/infections other than HP/ drug hypersensitivity
446	Disesase/s different from spontaneous urticaria or gastrointestinal complaints (GICs) or diseases secondary to parasites/infections other than HP/ drug hypersensitivity
447	Disesase/s different from spontaneous urticaria or gastrointestinal complaints (GICs) or diseases secondary to parasites/infections other than HP/ drug hypersensitivity
448	Disesase/s different from spontaneous urticaria or gastrointestinal complaints (GICs) or diseases secondary to parasites/infections other than HP/ drug hypersensitivity
449	Disesase/s different from spontaneous urticaria or gastrointestinal complaints (GICs) or diseases secondary to parasites/infections other than HP/ drug hypersensitivity
450	Disesase/s different from spontaneous urticaria or gastrointestinal complaints (GICs) or diseases secondary to parasites/infections other than HP/ drug hypersensitivity
451	Disesase/s different from spontaneous urticaria or gastrointestinal complaints (GICs) or diseases secondary to parasites/infections other than HP/ drug hypersensitivity
452	Disesase/s different from spontaneous urticaria or gastrointestinal complaints (GICs) or diseases secondary to parasites/infections other than HP/ drug hypersensitivity
453	Disesase/s different from spontaneous urticaria or gastrointestinal complaints (GICs) or diseases secondary to parasites/infections other than HP/ drug hypersensitivity
454	Disesase/s different from spontaneous urticaria or gastrointestinal complaints (GICs) or diseases secondary to parasites/infections other than HP/ drug hypersensitivity
455	Disesase/s different from spontaneous urticaria or gastrointestinal complaints (GICs) or diseases secondary to parasites/infections other than HP/ drug hypersensitivity
456	Disesase/s different from spontaneous urticaria or gastrointestinal complaints (GICs) or diseases secondary to parasites/infections other than HP/ drug hypersensitivity
457	Disesase/s different from spontaneous urticaria or gastrointestinal complaints (GICs) or diseases secondary to parasites/infections other than HP/ drug hypersensitivity
458	Disesase/s different from spontaneous urticaria or gastrointestinal complaints (GICs) or diseases secondary to parasites/infections other than HP/ drug hypersensitivity
459	Disesase/s different from spontaneous urticaria or gastrointestinal complaints (GICs) or diseases secondary to parasites/infections other than HP/ drug hypersensitivity
460	Disesase/s different from spontaneous urticaria or gastrointestinal complaints (GICs) or diseases secondary to parasites/infections other than HP/ drug hypersensitivity
461	Disesase/s different from spontaneous urticaria or gastrointestinal complaints (GICs) or diseases secondary to parasites/infections other than HP/ drug hypersensitivity
462	Disesase/s different from spontaneous urticaria or gastrointestinal complaints (GICs) or diseases secondary to parasites/infections other than HP/ drug hypersensitivity
463	Disesase/s different from spontaneous urticaria or gastrointestinal complaints (GICs) or diseases secondary to parasites/infections other than HP/ drug hypersensitivity
464	Disesase/s different from spontaneous urticaria or gastrointestinal complaints (GICs) or diseases secondary to parasites/infections other than HP/ drug hypersensitivity
465	Disesase/s different from spontaneous urticaria or gastrointestinal complaints (GICs) or diseases secondary to parasites/infections other than HP/ drug hypersensitivity
466	Disesase/s different from spontaneous urticaria or gastrointestinal complaints (GICs) or diseases secondary to parasites/infections other than HP/ drug hypersensitivity
467	Disesase/s different from spontaneous urticaria or gastrointestinal complaints (GICs) or diseases secondary to parasites/infections other than HP/ drug hypersensitivity
468	Disesase/s different from spontaneous urticaria or gastrointestinal complaints (GICs) or diseases secondary to parasites/infections other than HP/ drug hypersensitivity
469	Disesase/s different from spontaneous urticaria or gastrointestinal complaints (GICs) or diseases secondary to parasites/infections other than HP/ drug hypersensitivity
470	Disesase/s different from spontaneous urticaria or gastrointestinal complaints (GICs) or diseases secondary to parasites/infections other than HP/ drug hypersensitivity
471	Disesase/s different from spontaneous urticaria or gastrointestinal complaints (GICs) or diseases secondary to parasites/infections other than HP/ drug hypersensitivity
472	Disesase/s different from spontaneous urticaria or gastrointestinal complaints (GICs) or diseases secondary to parasites/infections other than HP/ drug hypersensitivity
473	Disesase/s different from spontaneous urticaria or gastrointestinal complaints (GICs) or diseases secondary to parasites/infections other than HP/ drug hypersensitivity
474	Disesase/s different from spontaneous urticaria or gastrointestinal complaints (GICs) or diseases secondary to parasites/infections other than HP/ drug hypersensitivity
475	Disesase/s different from spontaneous urticaria or gastrointestinal complaints (GICs) or diseases secondary to parasites/infections other than HP/ drug hypersensitivity
476	Disesase/s different from spontaneous urticaria or gastrointestinal complaints (GICs) or diseases secondary to parasites/infections other than HP/ drug hypersensitivity
477	Disesase/s different from spontaneous urticaria or gastrointestinal complaints (GICs) or diseases secondary to parasites/infections other than HP/ drug hypersensitivity
478	Disesase/s different from spontaneous urticaria or gastrointestinal complaints (GICs) or diseases secondary to parasites/infections other than HP/ drug hypersensitivity
479	Disesase/s different from spontaneous urticaria or gastrointestinal complaints (GICs) or diseases secondary to parasites/infections other than HP/ drug hypersensitivity
480	Disesase/s different from spontaneous urticaria or gastrointestinal complaints (GICs) or diseases secondary to parasites/infections other than HP/ drug hypersensitivity
481	Disesase/s different from spontaneous urticaria or gastrointestinal complaints (GICs) or diseases secondary to parasites/infections other than HP/ drug hypersensitivity
482	Disesase/s different from spontaneous urticaria or gastrointestinal complaints (GICs) or diseases secondary to parasites/infections other than HP/ drug hypersensitivity
483	Disesase/s different from spontaneous urticaria or gastrointestinal complaints (GICs) or diseases secondary to parasites/infections other than HP/ drug hypersensitivity
484	Disesase/s different from spontaneous urticaria or gastrointestinal complaints (GICs) or diseases secondary to parasites/infections other than HP/ drug hypersensitivity
485	Disesase/s different from spontaneous urticaria or gastrointestinal complaints (GICs) or diseases secondary to parasites/infections other than HP/ drug hypersensitivity
486	Disesase/s different from spontaneous urticaria or gastrointestinal complaints (GICs) or diseases secondary to parasites/infections other than HP/ drug hypersensitivity
487	Disesase/s different from spontaneous urticaria or gastrointestinal complaints (GICs) or diseases secondary to parasites/infections other than HP/ drug hypersensitivity
488	Disesase/s different from spontaneous urticaria or gastrointestinal complaints (GICs) or diseases secondary to parasites/infections other than HP/ drug hypersensitivity
489	Disesase/s different from spontaneous urticaria or gastrointestinal complaints (GICs) or diseases secondary to parasites/infections other than HP/ drug hypersensitivity
490	Disesase/s different from spontaneous urticaria or gastrointestinal complaints (GICs) or diseases secondary to parasites/infections other than HP/ drug hypersensitivity
491	Disesase/s different from spontaneous urticaria or gastrointestinal complaints (GICs) or diseases secondary to parasites/infections other than HP/ drug hypersensitivity
492	Disesase/s different from spontaneous urticaria or gastrointestinal complaints (GICs) or diseases secondary to parasites/infections other than HP/ drug hypersensitivity
493	Disesase/s different from spontaneous urticaria or gastrointestinal complaints (GICs) or diseases secondary to parasites/infections other than HP/ drug hypersensitivity
494	Disesase/s different from spontaneous urticaria or gastrointestinal complaints (GICs) or diseases secondary to parasites/infections other than HP/ drug hypersensitivity
495	Disesase/s different from spontaneous urticaria or gastrointestinal complaints (GICs) or diseases secondary to parasites/infections other than HP/ drug hypersensitivity
496	Disesase/s different from spontaneous urticaria or gastrointestinal complaints (GICs) or diseases secondary to parasites/infections other than HP/ drug hypersensitivity
497	Disesase/s different from spontaneous urticaria or gastrointestinal complaints (GICs) or diseases secondary to parasites/infections other than HP/ drug hypersensitivity
498	Disesase/s different from spontaneous urticaria or gastrointestinal complaints (GICs) or diseases secondary to parasites/infections other than HP/ drug hypersensitivity
499	Disesase/s different from spontaneous urticaria or gastrointestinal complaints (GICs) or diseases secondary to parasites/infections other than HP/ drug hypersensitivity
500	Disesase/s different from spontaneous urticaria or gastrointestinal complaints (GICs) or diseases secondary to parasites/infections other than HP/ drug hypersensitivity
501	Disesase/s different from spontaneous urticaria or gastrointestinal complaints (GICs) or diseases secondary to parasites/infections other than HP/ drug hypersensitivity
502	Disesase/s different from spontaneous urticaria or gastrointestinal complaints (GICs) or diseases secondary to parasites/infections other than HP/ drug hypersensitivity
503	Disesase/s different from spontaneous urticaria or gastrointestinal complaints (GICs) or diseases secondary to parasites/infections other than HP/ drug hypersensitivity
504	Disesase/s different from spontaneous urticaria or gastrointestinal complaints (GICs) or diseases secondary to parasites/infections other than HP/ drug hypersensitivity
505	Disesase/s different from spontaneous urticaria or gastrointestinal complaints (GICs) or diseases secondary to parasites/infections other than HP/ drug hypersensitivity
506	Disesase/s different from spontaneous urticaria or gastrointestinal complaints (GICs) or diseases secondary to parasites/infections other than HP/ drug hypersensitivity
507	Disesase/s different from spontaneous urticaria or gastrointestinal complaints (GICs) or diseases secondary to parasites/infections other than HP/ drug hypersensitivity
508	Disesase/s different from spontaneous urticaria or gastrointestinal complaints (GICs) or diseases secondary to parasites/infections other than HP/ drug hypersensitivity
509	Disesase/s different from spontaneous urticaria or gastrointestinal complaints (GICs) or diseases secondary to parasites/infections other than HP/ drug hypersensitivity
510	Disesase/s different from spontaneous urticaria or gastrointestinal complaints (GICs) or diseases secondary to parasites/infections other than HP/ drug hypersensitivity
511	Disesase/s different from spontaneous urticaria or gastrointestinal complaints (GICs) or diseases secondary to parasites/infections other than HP/ drug hypersensitivity
512	Disesase/s different from spontaneous urticaria or gastrointestinal complaints (GICs) or diseases secondary to parasites/infections other than HP/ drug hypersensitivity
513	Disesase/s different from spontaneous urticaria or gastrointestinal complaints (GICs) or diseases secondary to parasites/infections other than HP/ drug hypersensitivity
514	Disesase/s different from spontaneous urticaria or gastrointestinal complaints (GICs) or diseases secondary to parasites/infections other than HP/ drug hypersensitivity
515	Disesase/s different from spontaneous urticaria or gastrointestinal complaints (GICs) or diseases secondary to parasites/infections other than HP/ drug hypersensitivity
516	Disesase/s different from spontaneous urticaria or gastrointestinal complaints (GICs) or diseases secondary to parasites/infections other than HP/ drug hypersensitivity
517	Disesase/s different from spontaneous urticaria or gastrointestinal complaints (GICs) or diseases secondary to parasites/infections other than HP/ drug hypersensitivity
518	Disesase/s different from spontaneous urticaria or gastrointestinal complaints (GICs) or diseases secondary to parasites/infections other than HP/ drug hypersensitivity
519	Disesase/s different from spontaneous urticaria or gastrointestinal complaints (GICs) or diseases secondary to parasites/infections other than HP/ drug hypersensitivity
520	Disesase/s different from spontaneous urticaria or gastrointestinal complaints (GICs) or diseases secondary to parasites/infections other than HP/ drug hypersensitivity
521	Disesase/s different from spontaneous urticaria or gastrointestinal complaints (GICs) or diseases secondary to parasites/infections other than HP/ drug hypersensitivity
522	Disesase/s different from spontaneous urticaria or gastrointestinal complaints (GICs) or diseases secondary to parasites/infections other than HP/ drug hypersensitivity
523	Disesase/s different from spontaneous urticaria or gastrointestinal complaints (GICs) or diseases secondary to parasites/infections other than HP/ drug hypersensitivity
524	Disesase/s different from spontaneous urticaria or gastrointestinal complaints (GICs) or diseases secondary to parasites/infections other than HP/ drug hypersensitivity
525	Disesase/s different from spontaneous urticaria or gastrointestinal complaints (GICs) or diseases secondary to parasites/infections other than HP/ drug hypersensitivity
526	Disesase/s different from spontaneous urticaria or gastrointestinal complaints (GICs) or diseases secondary to parasites/infections other than HP/ drug hypersensitivity
527	Disesase/s different from spontaneous urticaria or gastrointestinal complaints (GICs) or diseases secondary to parasites/infections other than HP/ drug hypersensitivity
528	Disesase/s different from spontaneous urticaria or gastrointestinal complaints (GICs) or diseases secondary to parasites/infections other than HP/ drug hypersensitivity
529	Disesase/s different from spontaneous urticaria or gastrointestinal complaints (GICs) or diseases secondary to parasites/infections other than HP/ drug hypersensitivity
530	Disesase/s different from spontaneous urticaria or gastrointestinal complaints (GICs) or diseases secondary to parasites/infections other than HP/ drug hypersensitivity
531	Disesase/s different from spontaneous urticaria or gastrointestinal complaints (GICs) or diseases secondary to parasites/infections other than HP/ drug hypersensitivity
532	Disesase/s different from spontaneous urticaria or gastrointestinal complaints (GICs) or diseases secondary to parasites/infections other than HP/ drug hypersensitivity
533	Disesase/s different from spontaneous urticaria or gastrointestinal complaints (GICs) or diseases secondary to parasites/infections other than HP/ drug hypersensitivity
534	Disesase/s different from spontaneous urticaria or gastrointestinal complaints (GICs) or diseases secondary to parasites/infections other than HP/ drug hypersensitivity
535	Disesase/s different from spontaneous urticaria or gastrointestinal complaints (GICs) or diseases secondary to parasites/infections other than HP/ drug hypersensitivity
536	Disesase/s different from spontaneous urticaria or gastrointestinal complaints (GICs) or diseases secondary to parasites/infections other than HP/ drug hypersensitivity
537	Disesase/s different from spontaneous urticaria or gastrointestinal complaints (GICs) or diseases secondary to parasites/infections other than HP/ drug hypersensitivity
538	Disesase/s different from spontaneous urticaria or gastrointestinal complaints (GICs) or diseases secondary to parasites/infections other than HP/ drug hypersensitivity
539	Disesase/s different from spontaneous urticaria or gastrointestinal complaints (GICs) or diseases secondary to parasites/infections other than HP/ drug hypersensitivity
540	Disesase/s different from spontaneous urticaria or gastrointestinal complaints (GICs) or diseases secondary to parasites/infections other than HP/ drug hypersensitivity
541	Disesase/s different from spontaneous urticaria or gastrointestinal complaints (GICs) or diseases secondary to parasites/infections other than HP/ drug hypersensitivity
542	Disesase/s different from spontaneous urticaria or gastrointestinal complaints (GICs) or diseases secondary to parasites/infections other than HP/ drug hypersensitivity
543	Disesase/s different from spontaneous urticaria or gastrointestinal complaints (GICs) or diseases secondary to parasites/infections other than HP/ drug hypersensitivity
544	Disesase/s different from spontaneous urticaria or gastrointestinal complaints (GICs) or diseases secondary to parasites/infections other than HP/ drug hypersensitivity
545	Disesase/s different from spontaneous urticaria or gastrointestinal complaints (GICs) or diseases secondary to parasites/infections other than HP/ drug hypersensitivity
546	Disesase/s different from spontaneous urticaria or gastrointestinal complaints (GICs) or diseases secondary to parasites/infections other than HP/ drug hypersensitivity
547	Disesase/s different from spontaneous urticaria or gastrointestinal complaints (GICs) or diseases secondary to parasites/infections other than HP/ drug hypersensitivity
548	Disesase/s different from spontaneous urticaria or gastrointestinal complaints (GICs) or diseases secondary to parasites/infections other than HP/ drug hypersensitivity
549	Disesase/s different from spontaneous urticaria or gastrointestinal complaints (GICs) or diseases secondary to parasites/infections other than HP/ drug hypersensitivity
550	Disesase/s different from spontaneous urticaria or gastrointestinal complaints (GICs) or diseases secondary to parasites/infections other than HP/ drug hypersensitivity
551	Disesase/s different from spontaneous urticaria or gastrointestinal complaints (GICs) or diseases secondary to parasites/infections other than HP/ drug hypersensitivity
552	Disesase/s different from spontaneous urticaria or gastrointestinal complaints (GICs) or diseases secondary to parasites/infections other than HP/ drug hypersensitivity
553	Disesase/s different from spontaneous urticaria or gastrointestinal complaints (GICs) or diseases secondary to parasites/infections other than HP/ drug hypersensitivity
554	Disesase/s different from spontaneous urticaria or gastrointestinal complaints (GICs) or diseases secondary to parasites/infections other than HP/ drug hypersensitivity
555	Disesase/s different from spontaneous urticaria or gastrointestinal complaints (GICs) or diseases secondary to parasites/infections other than HP/ drug hypersensitivity
556	Disesase/s different from spontaneous urticaria or gastrointestinal complaints (GICs) or diseases secondary to parasites/infections other than HP/ drug hypersensitivity
557	Disesase/s different from spontaneous urticaria or gastrointestinal complaints (GICs) or diseases secondary to parasites/infections other than HP/ drug hypersensitivity
558	Disesase/s different from spontaneous urticaria or gastrointestinal complaints (GICs) or diseases secondary to parasites/infections other than HP/ drug hypersensitivity
559	Disesase/s different from spontaneous urticaria or gastrointestinal complaints (GICs) or diseases secondary to parasites/infections other than HP/ drug hypersensitivity
560	Disesase/s different from spontaneous urticaria or gastrointestinal complaints (GICs) or diseases secondary to parasites/infections other than HP/ drug hypersensitivity
561	Disesase/s different from spontaneous urticaria or gastrointestinal complaints (GICs) or diseases secondary to parasites/infections other than HP/ drug hypersensitivity
562	Disesase/s different from spontaneous urticaria or gastrointestinal complaints (GICs) or diseases secondary to parasites/infections other than HP/ drug hypersensitivity
563	Disesase/s different from spontaneous urticaria or gastrointestinal complaints (GICs) or diseases secondary to parasites/infections other than HP/ drug hypersensitivity
564	Disesase/s different from spontaneous urticaria or gastrointestinal complaints (GICs) or diseases secondary to parasites/infections other than HP/ drug hypersensitivity
565	Disesase/s different from spontaneous urticaria or gastrointestinal complaints (GICs) or diseases secondary to parasites/infections other than HP/ drug hypersensitivity
566	Disesase/s different from spontaneous urticaria or gastrointestinal complaints (GICs) or diseases secondary to parasites/infections other than HP/ drug hypersensitivity
567	Disesase/s different from spontaneous urticaria or gastrointestinal complaints (GICs) or diseases secondary to parasites/infections other than HP/ drug hypersensitivity
568	Disesase/s different from spontaneous urticaria or gastrointestinal complaints (GICs) or diseases secondary to parasites/infections other than HP/ drug hypersensitivity
569	Disesase/s different from spontaneous urticaria or gastrointestinal complaints (GICs) or diseases secondary to parasites/infections other than HP/ drug hypersensitivity
570	Disesase/s different from spontaneous urticaria or gastrointestinal complaints (GICs) or diseases secondary to parasites/infections other than HP/ drug hypersensitivity
571	Disesase/s different from spontaneous urticaria or gastrointestinal complaints (GICs) or diseases secondary to parasites/infections other than HP/ drug hypersensitivity
572	Disesase/s different from spontaneous urticaria or gastrointestinal complaints (GICs) or diseases secondary to parasites/infections other than HP/ drug hypersensitivity
573	Disesase/s different from spontaneous urticaria or gastrointestinal complaints (GICs) or diseases secondary to parasites/infections other than HP/ drug hypersensitivity
574	Disesase/s different from spontaneous urticaria or gastrointestinal complaints (GICs) or diseases secondary to parasites/infections other than HP/ drug hypersensitivity
575	Disesase/s different from spontaneous urticaria or gastrointestinal complaints (GICs) or diseases secondary to parasites/infections other than HP/ drug hypersensitivity
576	Disesase/s different from spontaneous urticaria or gastrointestinal complaints (GICs) or diseases secondary to parasites/infections other than HP/ drug hypersensitivity
577	Disesase/s different from spontaneous urticaria or gastrointestinal complaints (GICs) or diseases secondary to parasites/infections other than HP/ drug hypersensitivity
578	Disesase/s different from spontaneous urticaria or gastrointestinal complaints (GICs) or diseases secondary to parasites/infections other than HP/ drug hypersensitivity
579	Disesase/s different from spontaneous urticaria or gastrointestinal complaints (GICs) or diseases secondary to parasites/infections other than HP/ drug hypersensitivity
580	Disesase/s different from spontaneous urticaria or gastrointestinal complaints (GICs) or diseases secondary to parasites/infections other than HP/ drug hypersensitivity
581	Disesase/s different from spontaneous urticaria or gastrointestinal complaints (GICs) or diseases secondary to parasites/infections other than HP/ drug hypersensitivity
582	Disesase/s different from spontaneous urticaria or gastrointestinal complaints (GICs) or diseases secondary to parasites/infections other than HP/ drug hypersensitivity
583	Disesase/s different from spontaneous urticaria or gastrointestinal complaints (GICs) or diseases secondary to parasites/infections other than HP/ drug hypersensitivity
584	Disesase/s different from spontaneous urticaria or gastrointestinal complaints (GICs) or diseases secondary to parasites/infections other than HP/ drug hypersensitivity
585	Disesase/s different from spontaneous urticaria or gastrointestinal complaints (GICs) or diseases secondary to parasites/infections other than HP/ drug hypersensitivity
586	Disesase/s different from spontaneous urticaria or gastrointestinal complaints (GICs) or diseases secondary to parasites/infections other than HP/ drug hypersensitivity
587	Disesase/s different from spontaneous urticaria or gastrointestinal complaints (GICs) or diseases secondary to parasites/infections other than HP/ drug hypersensitivity
588	Disesase/s different from spontaneous urticaria or gastrointestinal complaints (GICs) or diseases secondary to parasites/infections other than HP/ drug hypersensitivity
589	Disesase/s different from spontaneous urticaria or gastrointestinal complaints (GICs) or diseases secondary to parasites/infections other than HP/ drug hypersensitivity
590	Disesase/s different from spontaneous urticaria or gastrointestinal complaints (GICs) or diseases secondary to parasites/infections other than HP/ drug hypersensitivity
591	Disesase/s different from spontaneous urticaria or gastrointestinal complaints (GICs) or diseases secondary to parasites/infections other than HP/ drug hypersensitivity
592	Disesase/s different from spontaneous urticaria or gastrointestinal complaints (GICs) or diseases secondary to parasites/infections other than HP/ drug hypersensitivity
593	Disesase/s different from spontaneous urticaria or gastrointestinal complaints (GICs) or diseases secondary to parasites/infections other than HP/ drug hypersensitivity
594	Disesase/s different from spontaneous urticaria or gastrointestinal complaints (GICs) or diseases secondary to parasites/infections other than HP/ drug hypersensitivity
595	Disesase/s different from spontaneous urticaria or gastrointestinal complaints (GICs) or diseases secondary to parasites/infections other than HP/ drug hypersensitivity
596	Disesase/s different from spontaneous urticaria or gastrointestinal complaints (GICs) or diseases secondary to parasites/infections other than HP/ drug hypersensitivity
597	Disesase/s different from spontaneous urticaria or gastrointestinal complaints (GICs) or diseases secondary to parasites/infections other than HP/ drug hypersensitivity
598	Disesase/s different from spontaneous urticaria or gastrointestinal complaints (GICs) or diseases secondary to parasites/infections other than HP/ drug hypersensitivity
599	Disesase/s different from spontaneous urticaria or gastrointestinal complaints (GICs) or diseases secondary to parasites/infections other than HP/ drug hypersensitivity
600	Disesase/s different from spontaneous urticaria or gastrointestinal complaints (GICs) or diseases secondary to parasites/infections other than HP/ drug hypersensitivity
601	Disesase/s different from spontaneous urticaria or gastrointestinal complaints (GICs) or diseases secondary to parasites/infections other than HP/ drug hypersensitivity
602	Disesase/s different from spontaneous urticaria or gastrointestinal complaints (GICs) or diseases secondary to parasites/infections other than HP/ drug hypersensitivity
603	Disesase/s different from spontaneous urticaria or gastrointestinal complaints (GICs) or diseases secondary to parasites/infections other than HP/ drug hypersensitivity
604	Disesase/s different from spontaneous urticaria or gastrointestinal complaints (GICs) or diseases secondary to parasites/infections other than HP/ drug hypersensitivity
605	Disesase/s different from spontaneous urticaria or gastrointestinal complaints (GICs) or diseases secondary to parasites/infections other than HP/ drug hypersensitivity
606	Disesase/s different from spontaneous urticaria or gastrointestinal complaints (GICs) or diseases secondary to parasites/infections other than HP/ drug hypersensitivity
607	Disesase/s different from spontaneous urticaria or gastrointestinal complaints (GICs) or diseases secondary to parasites/infections other than HP/ drug hypersensitivity
608	Disesase/s different from spontaneous urticaria or gastrointestinal complaints (GICs) or diseases secondary to parasites/infections other than HP/ drug hypersensitivity
609	Disesase/s different from spontaneous urticaria or gastrointestinal complaints (GICs) or diseases secondary to parasites/infections other than HP/ drug hypersensitivity
610	Disesase/s different from spontaneous urticaria or gastrointestinal complaints (GICs) or diseases secondary to parasites/infections other than HP/ drug hypersensitivity
611	Disesase/s different from spontaneous urticaria or gastrointestinal complaints (GICs) or diseases secondary to parasites/infections other than HP/ drug hypersensitivity
612	Disesase/s different from spontaneous urticaria or gastrointestinal complaints (GICs) or diseases secondary to parasites/infections other than HP/ drug hypersensitivity
613	Disesase/s different from spontaneous urticaria or gastrointestinal complaints (GICs) or diseases secondary to parasites/infections other than HP/ drug hypersensitivity
614	Disesase/s different from spontaneous urticaria or gastrointestinal complaints (GICs) or diseases secondary to parasites/infections other than HP/ drug hypersensitivity
615	Disesase/s different from spontaneous urticaria or gastrointestinal complaints (GICs) or diseases secondary to parasites/infections other than HP/ drug hypersensitivity
616	Disesase/s different from spontaneous urticaria or gastrointestinal complaints (GICs) or diseases secondary to parasites/infections other than HP/ drug hypersensitivity
617	Disesase/s different from spontaneous urticaria or gastrointestinal complaints (GICs) or diseases secondary to parasites/infections other than HP/ drug hypersensitivity
618	Disesase/s different from spontaneous urticaria or gastrointestinal complaints (GICs) or diseases secondary to parasites/infections other than HP/ drug hypersensitivity
619	Disesase/s different from spontaneous urticaria or gastrointestinal complaints (GICs) or diseases secondary to parasites/infections other than HP/ drug hypersensitivity
620	Disesase/s different from spontaneous urticaria or gastrointestinal complaints (GICs) or diseases secondary to parasites/infections other than HP/ drug hypersensitivity
621	Disesase/s different from spontaneous urticaria or gastrointestinal complaints (GICs) or diseases secondary to parasites/infections other than HP/ drug hypersensitivity
622	Disesase/s different from spontaneous urticaria or gastrointestinal complaints (GICs) or diseases secondary to parasites/infections other than HP/ drug hypersensitivity
623	Disesase/s different from spontaneous urticaria or gastrointestinal complaints (GICs) or diseases secondary to parasites/infections other than HP/ drug hypersensitivity
624	Disesase/s different from spontaneous urticaria or gastrointestinal complaints (GICs) or diseases secondary to parasites/infections other than HP/ drug hypersensitivity
625	Disesase/s different from spontaneous urticaria or gastrointestinal complaints (GICs) or diseases secondary to parasites/infections other than HP/ drug hypersensitivity
626	Disesase/s different from spontaneous urticaria or gastrointestinal complaints (GICs) or diseases secondary to parasites/infections other than HP/ drug hypersensitivity
627	Disesase/s different from spontaneous urticaria or gastrointestinal complaints (GICs) or diseases secondary to parasites/infections other than HP/ drug hypersensitivity
628	Disesase/s different from spontaneous urticaria or gastrointestinal complaints (GICs) or diseases secondary to parasites/infections other than HP/ drug hypersensitivity
629	Disesase/s different from spontaneous urticaria or gastrointestinal complaints (GICs) or diseases secondary to parasites/infections other than HP/ drug hypersensitivity
630	Disesase/s different from spontaneous urticaria or gastrointestinal complaints (GICs) or diseases secondary to parasites/infections other than HP/ drug hypersensitivity
631	Disesase/s different from spontaneous urticaria or gastrointestinal complaints (GICs) or diseases secondary to parasites/infections other than HP/ drug hypersensitivity
632	Disesase/s different from spontaneous urticaria or gastrointestinal complaints (GICs) or diseases secondary to parasites/infections other than HP/ drug hypersensitivity
633	Disesase/s different from spontaneous urticaria or gastrointestinal complaints (GICs) or diseases secondary to parasites/infections other than HP/ drug hypersensitivity
634	Disesase/s different from spontaneous urticaria or gastrointestinal complaints (GICs) or diseases secondary to parasites/infections other than HP/ drug hypersensitivity
635	Disesase/s different from spontaneous urticaria or gastrointestinal complaints (GICs) or diseases secondary to parasites/infections other than HP/ drug hypersensitivity
636	Disesase/s different from spontaneous urticaria or gastrointestinal complaints (GICs) or diseases secondary to parasites/infections other than HP/ drug hypersensitivity
637	Disesase/s different from spontaneous urticaria or gastrointestinal complaints (GICs) or diseases secondary to parasites/infections other than HP/ drug hypersensitivity
638	Disesase/s different from spontaneous urticaria or gastrointestinal complaints (GICs) or diseases secondary to parasites/infections other than HP/ drug hypersensitivity
639	Disesase/s different from spontaneous urticaria or gastrointestinal complaints (GICs) or diseases secondary to parasites/infections other than HP/ drug hypersensitivity
640	Disesase/s different from spontaneous urticaria or gastrointestinal complaints (GICs) or diseases secondary to parasites/infections other than HP/ drug hypersensitivity
641	Disesase/s different from spontaneous urticaria or gastrointestinal complaints (GICs) or diseases secondary to parasites/infections other than HP/ drug hypersensitivity
642	Disesase/s different from spontaneous urticaria or gastrointestinal complaints (GICs) or diseases secondary to parasites/infections other than HP/ drug hypersensitivity
643	Disesase/s different from spontaneous urticaria or gastrointestinal complaints (GICs) or diseases secondary to parasites/infections other than HP/ drug hypersensitivity
644	Disesase/s different from spontaneous urticaria or gastrointestinal complaints (GICs) or diseases secondary to parasites/infections other than HP/ drug hypersensitivity
645	Disesase/s different from spontaneous urticaria or gastrointestinal complaints (GICs) or diseases secondary to parasites/infections other than HP/ drug hypersensitivity
646	Disesase/s different from spontaneous urticaria or gastrointestinal complaints (GICs) or diseases secondary to parasites/infections other than HP/ drug hypersensitivity
647	Disesase/s different from spontaneous urticaria or gastrointestinal complaints (GICs) or diseases secondary to parasites/infections other than HP/ drug hypersensitivity
648	Disesase/s different from spontaneous urticaria or gastrointestinal complaints (GICs) or diseases secondary to parasites/infections other than HP/ drug hypersensitivity
649	Disesase/s different from spontaneous urticaria or gastrointestinal complaints (GICs) or diseases secondary to parasites/infections other than HP/ drug hypersensitivity
650	Disesase/s different from spontaneous urticaria or gastrointestinal complaints (GICs) or diseases secondary to parasites/infections other than HP/ drug hypersensitivity
651	Disesase/s different from spontaneous urticaria or gastrointestinal complaints (GICs) or diseases secondary to parasites/infections other than HP/ drug hypersensitivity
652	Disesase/s different from spontaneous urticaria or gastrointestinal complaints (GICs) or diseases secondary to parasites/infections other than HP/ drug hypersensitivity
653	Disesase/s different from spontaneous urticaria or gastrointestinal complaints (GICs) or diseases secondary to parasites/infections other than HP/ drug hypersensitivity
654	Disesase/s different from spontaneous urticaria or gastrointestinal complaints (GICs) or diseases secondary to parasites/infections other than HP/ drug hypersensitivity
655	Disesase/s different from spontaneous urticaria or gastrointestinal complaints (GICs) or diseases secondary to parasites/infections other than HP/ drug hypersensitivity
656	Disesase/s different from spontaneous urticaria or gastrointestinal complaints (GICs) or diseases secondary to parasites/infections other than HP/ drug hypersensitivity
657	Disesase/s different from spontaneous urticaria or gastrointestinal complaints (GICs) or diseases secondary to parasites/infections other than HP/ drug hypersensitivity
658	Disesase/s different from spontaneous urticaria or gastrointestinal complaints (GICs) or diseases secondary to parasites/infections other than HP/ drug hypersensitivity
659	Disesase/s different from spontaneous urticaria or gastrointestinal complaints (GICs) or diseases secondary to parasites/infections other than HP/ drug hypersensitivity
660	Disesase/s different from spontaneous urticaria or gastrointestinal complaints (GICs) or diseases secondary to parasites/infections other than HP/ drug hypersensitivity
661	Disesase/s different from spontaneous urticaria or gastrointestinal complaints (GICs) or diseases secondary to parasites/infections other than HP/ drug hypersensitivity
662	Disesase/s different from spontaneous urticaria or gastrointestinal complaints (GICs) or diseases secondary to parasites/infections other than HP/ drug hypersensitivity
663	Disesase/s different from spontaneous urticaria or gastrointestinal complaints (GICs) or diseases secondary to parasites/infections other than HP/ drug hypersensitivity
664	Disesase/s different from spontaneous urticaria or gastrointestinal complaints (GICs) or diseases secondary to parasites/infections other than HP/ drug hypersensitivity
665	Disesase/s different from spontaneous urticaria or gastrointestinal complaints (GICs) or diseases secondary to parasites/infections other than HP/ drug hypersensitivity
666	Disesase/s different from spontaneous urticaria or gastrointestinal complaints (GICs) or diseases secondary to parasites/infections other than HP/ drug hypersensitivity
667	Disesase/s different from spontaneous urticaria or gastrointestinal complaints (GICs) or diseases secondary to parasites/infections other than HP/ drug hypersensitivity
668	Disesase/s different from spontaneous urticaria or gastrointestinal complaints (GICs) or diseases secondary to parasites/infections other than HP/ drug hypersensitivity
669	Disesase/s different from spontaneous urticaria or gastrointestinal complaints (GICs) or diseases secondary to parasites/infections other than HP/ drug hypersensitivity
670	Disesase/s different from spontaneous urticaria or gastrointestinal complaints (GICs) or diseases secondary to parasites/infections other than HP/ drug hypersensitivity
671	Disesase/s different from spontaneous urticaria or gastrointestinal complaints (GICs) or diseases secondary to parasites/infections other than HP/ drug hypersensitivity
672	Disesase/s different from spontaneous urticaria or gastrointestinal complaints (GICs) or diseases secondary to parasites/infections other than HP/ drug hypersensitivity
673	Disesase/s different from spontaneous urticaria or gastrointestinal complaints (GICs) or diseases secondary to parasites/infections other than HP/ drug hypersensitivity
674	Disesase/s different from spontaneous urticaria or gastrointestinal complaints (GICs) or diseases secondary to parasites/infections other than HP/ drug hypersensitivity
675	Disesase/s different from spontaneous urticaria or gastrointestinal complaints (GICs) or diseases secondary to parasites/infections other than HP/ drug hypersensitivity
676	Disesase/s different from spontaneous urticaria or gastrointestinal complaints (GICs) or diseases secondary to parasites/infections other than HP/ drug hypersensitivity
677	Disesase/s different from spontaneous urticaria or gastrointestinal complaints (GICs) or diseases secondary to parasites/infections other than HP/ drug hypersensitivity
678	Disesase/s different from spontaneous urticaria or gastrointestinal complaints (GICs) or diseases secondary to parasites/infections other than HP/ drug hypersensitivity
679	Disesase/s different from spontaneous urticaria or gastrointestinal complaints (GICs) or diseases secondary to parasites/infections other than HP/ drug hypersensitivity
680	Disesase/s different from spontaneous urticaria or gastrointestinal complaints (GICs) or diseases secondary to parasites/infections other than HP/ drug hypersensitivity
681	Disesase/s different from spontaneous urticaria or gastrointestinal complaints (GICs) or diseases secondary to parasites/infections other than HP/ drug hypersensitivity
682	Disesase/s different from spontaneous urticaria or gastrointestinal complaints (GICs) or diseases secondary to parasites/infections other than HP/ drug hypersensitivity
683	Disesase/s different from spontaneous urticaria or gastrointestinal complaints (GICs) or diseases secondary to parasites/infections other than HP/ drug hypersensitivity
684	Disesase/s different from spontaneous urticaria or gastrointestinal complaints (GICs) or diseases secondary to parasites/infections other than HP/ drug hypersensitivity
685	Disesase/s different from spontaneous urticaria or gastrointestinal complaints (GICs) or diseases secondary to parasites/infections other than HP/ drug hypersensitivity
686	Disesase/s different from spontaneous urticaria or gastrointestinal complaints (GICs) or diseases secondary to parasites/infections other than HP/ drug hypersensitivity
687	Disesase/s different from spontaneous urticaria or gastrointestinal complaints (GICs) or diseases secondary to parasites/infections other than HP/ drug hypersensitivity
688	Disesase/s different from spontaneous urticaria or gastrointestinal complaints (GICs) or diseases secondary to parasites/infections other than HP/ drug hypersensitivity
689	Disesase/s different from spontaneous urticaria or gastrointestinal complaints (GICs) or diseases secondary to parasites/infections other than HP/ drug hypersensitivity
690	Disesase/s different from spontaneous urticaria or gastrointestinal complaints (GICs) or diseases secondary to parasites/infections other than HP/ drug hypersensitivity
691	Disesase/s different from spontaneous urticaria or gastrointestinal complaints (GICs) or diseases secondary to parasites/infections other than HP/ drug hypersensitivity
692	Disesase/s different from spontaneous urticaria or gastrointestinal complaints (GICs) or diseases secondary to parasites/infections other than HP/ drug hypersensitivity
693	Disesase/s different from spontaneous urticaria or gastrointestinal complaints (GICs) or diseases secondary to parasites/infections other than HP/ drug hypersensitivity
694	Disesase/s different from spontaneous urticaria or gastrointestinal complaints (GICs) or diseases secondary to parasites/infections other than HP/ drug hypersensitivity
695	Disesase/s different from spontaneous urticaria or gastrointestinal complaints (GICs) or diseases secondary to parasites/infections other than HP/ drug hypersensitivity
696	Disesase/s different from spontaneous urticaria or gastrointestinal complaints (GICs) or diseases secondary to parasites/infections other than HP/ drug hypersensitivity
697	Disesase/s different from spontaneous urticaria or gastrointestinal complaints (GICs) or diseases secondary to parasites/infections other than HP/ drug hypersensitivity
698	Disesase/s different from spontaneous urticaria or gastrointestinal complaints (GICs) or diseases secondary to parasites/infections other than HP/ drug hypersensitivity
699	Disesase/s different from spontaneous urticaria or gastrointestinal complaints (GICs) or diseases secondary to parasites/infections other than HP/ drug hypersensitivity
700	Disesase/s different from spontaneous urticaria or gastrointestinal complaints (GICs) or diseases secondary to parasites/infections other than HP/ drug hypersensitivity
701	Disesase/s different from spontaneous urticaria or gastrointestinal complaints (GICs) or diseases secondary to parasites/infections other than HP/ drug hypersensitivity
702	Disesase/s different from spontaneous urticaria or gastrointestinal complaints (GICs) or diseases secondary to parasites/infections other than HP/ drug hypersensitivity
703	Disesase/s different from spontaneous urticaria or gastrointestinal complaints (GICs) or diseases secondary to parasites/infections other than HP/ drug hypersensitivity
704	Disesase/s different from spontaneous urticaria or gastrointestinal complaints (GICs) or diseases secondary to parasites/infections other than HP/ drug hypersensitivity
705	Disesase/s different from spontaneous urticaria or gastrointestinal complaints (GICs) or diseases secondary to parasites/infections other than HP/ drug hypersensitivity
706	Disesase/s different from spontaneous urticaria or gastrointestinal complaints (GICs) or diseases secondary to parasites/infections other than HP/ drug hypersensitivity
707	Disesase/s different from spontaneous urticaria or gastrointestinal complaints (GICs) or diseases secondary to parasites/infections other than HP/ drug hypersensitivity
708	Disesase/s different from spontaneous urticaria or gastrointestinal complaints (GICs) or diseases secondary to parasites/infections other than HP/ drug hypersensitivity
709	Disesase/s different from spontaneous urticaria or gastrointestinal complaints (GICs) or diseases secondary to parasites/infections other than HP/ drug hypersensitivity
710	Disesase/s different from spontaneous urticaria or gastrointestinal complaints (GICs) or diseases secondary to parasites/infections other than HP/ drug hypersensitivity
711	Disesase/s different from spontaneous urticaria or gastrointestinal complaints (GICs) or diseases secondary to parasites/infections other than HP/ drug hypersensitivity
712	Disesase/s different from spontaneous urticaria or gastrointestinal complaints (GICs) or diseases secondary to parasites/infections other than HP/ drug hypersensitivity
713	Disesase/s different from spontaneous urticaria or gastrointestinal complaints (GICs) or diseases secondary to parasites/infections other than HP/ drug hypersensitivity
714	Disesase/s different from spontaneous urticaria or gastrointestinal complaints (GICs) or diseases secondary to parasites/infections other than HP/ drug hypersensitivity
715	Disesase/s different from spontaneous urticaria or gastrointestinal complaints (GICs) or diseases secondary to parasites/infections other than HP/ drug hypersensitivity
716	Disesase/s different from spontaneous urticaria or gastrointestinal complaints (GICs) or diseases secondary to parasites/infections other than HP/ drug hypersensitivity
717	Disesase/s different from spontaneous urticaria or gastrointestinal complaints (GICs) or diseases secondary to parasites/infections other than HP/ drug hypersensitivity
718	Disesase/s different from spontaneous urticaria or gastrointestinal complaints (GICs) or diseases secondary to parasites/infections other than HP/ drug hypersensitivity
719	Disesase/s different from spontaneous urticaria or gastrointestinal complaints (GICs) or diseases secondary to parasites/infections other than HP/ drug hypersensitivity
720	Disesase/s different from spontaneous urticaria or gastrointestinal complaints (GICs) or diseases secondary to parasites/infections other than HP/ drug hypersensitivity
721	Disesase/s different from spontaneous urticaria or gastrointestinal complaints (GICs) or diseases secondary to parasites/infections other than HP/ drug hypersensitivity
722	Disesase/s different from spontaneous urticaria or gastrointestinal complaints (GICs) or diseases secondary to parasites/infections other than HP/ drug hypersensitivity
723	Disesase/s different from spontaneous urticaria or gastrointestinal complaints (GICs) or diseases secondary to parasites/infections other than HP/ drug hypersensitivity
724	Disesase/s different from spontaneous urticaria or gastrointestinal complaints (GICs) or diseases secondary to parasites/infections other than HP/ drug hypersensitivity
725	Disesase/s different from spontaneous urticaria or gastrointestinal complaints (GICs) or diseases secondary to parasites/infections other than HP/ drug hypersensitivity
726	Disesase/s different from spontaneous urticaria or gastrointestinal complaints (GICs) or diseases secondary to parasites/infections other than HP/ drug hypersensitivity
727	Disesase/s different from spontaneous urticaria or gastrointestinal complaints (GICs) or diseases secondary to parasites/infections other than HP/ drug hypersensitivity
728	Disesase/s different from spontaneous urticaria or gastrointestinal complaints (GICs) or diseases secondary to parasites/infections other than HP/ drug hypersensitivity
729	Disesase/s different from spontaneous urticaria or gastrointestinal complaints (GICs) or diseases secondary to parasites/infections other than HP/ drug hypersensitivity
730	Disesase/s different from spontaneous urticaria or gastrointestinal complaints (GICs) or diseases secondary to parasites/infections other than HP/ drug hypersensitivity
731	Disesase/s different from spontaneous urticaria or gastrointestinal complaints (GICs) or diseases secondary to parasites/infections other than HP/ drug hypersensitivity
732	Disesase/s different from spontaneous urticaria or gastrointestinal complaints (GICs) or diseases secondary to parasites/infections other than HP/ drug hypersensitivity
733	Disesase/s different from spontaneous urticaria or gastrointestinal complaints (GICs) or diseases secondary to parasites/infections other than HP/ drug hypersensitivity
734	Disesase/s different from spontaneous urticaria or gastrointestinal complaints (GICs) or diseases secondary to parasites/infections other than HP/ drug hypersensitivity
735	Disesase/s different from spontaneous urticaria or gastrointestinal complaints (GICs) or diseases secondary to parasites/infections other than HP/ drug hypersensitivity
736	Disesase/s different from spontaneous urticaria or gastrointestinal complaints (GICs) or diseases secondary to parasites/infections other than HP/ drug hypersensitivity
737	Disesase/s different from spontaneous urticaria or gastrointestinal complaints (GICs) or diseases secondary to parasites/infections other than HP/ drug hypersensitivity
738	Disesase/s different from spontaneous urticaria or gastrointestinal complaints (GICs) or diseases secondary to parasites/infections other than HP/ drug hypersensitivity
739	Disesase/s different from spontaneous urticaria or gastrointestinal complaints (GICs) or diseases secondary to parasites/infections other than HP/ drug hypersensitivity
740	Disesase/s different from spontaneous urticaria or gastrointestinal complaints (GICs) or diseases secondary to parasites/infections other than HP/ drug hypersensitivity
741	Disesase/s different from spontaneous urticaria or gastrointestinal complaints (GICs) or diseases secondary to parasites/infections other than HP/ drug hypersensitivity
742	Disesase/s different from spontaneous urticaria or gastrointestinal complaints (GICs) or diseases secondary to parasites/infections other than HP/ drug hypersensitivity
743	Disesase/s different from spontaneous urticaria or gastrointestinal complaints (GICs) or diseases secondary to parasites/infections other than HP/ drug hypersensitivity
744	Disesase/s different from spontaneous urticaria or gastrointestinal complaints (GICs) or diseases secondary to parasites/infections other than HP/ drug hypersensitivity
745	Disesase/s different from spontaneous urticaria or gastrointestinal complaints (GICs) or diseases secondary to parasites/infections other than HP/ drug hypersensitivity
746	Disesase/s different from spontaneous urticaria or gastrointestinal complaints (GICs) or diseases secondary to parasites/infections other than HP/ drug hypersensitivity
747	Disesase/s different from spontaneous urticaria or gastrointestinal complaints (GICs) or diseases secondary to parasites/infections other than HP/ drug hypersensitivity
748	Disesase/s different from spontaneous urticaria or gastrointestinal complaints (GICs) or diseases secondary to parasites/infections other than HP/ drug hypersensitivity
749	Disesase/s different from spontaneous urticaria or gastrointestinal complaints (GICs) or diseases secondary to parasites/infections other than HP/ drug hypersensitivity
750	Disesase/s different from spontaneous urticaria or gastrointestinal complaints (GICs) or diseases secondary to parasites/infections other than HP/ drug hypersensitivity
751	Disesase/s different from spontaneous urticaria or gastrointestinal complaints (GICs) or diseases secondary to parasites/infections other than HP/ drug hypersensitivity
752	Disesase/s different from spontaneous urticaria or gastrointestinal complaints (GICs) or diseases secondary to parasites/infections other than HP/ drug hypersensitivity
753	Disesase/s different from spontaneous urticaria or gastrointestinal complaints (GICs) or diseases secondary to parasites/infections other than HP/ drug hypersensitivity
754	Disesase/s different from spontaneous urticaria or gastrointestinal complaints (GICs) or diseases secondary to parasites/infections other than HP/ drug hypersensitivity
755	Disesase/s different from spontaneous urticaria or gastrointestinal complaints (GICs) or diseases secondary to parasites/infections other than HP/ drug hypersensitivity
756	Disesase/s different from spontaneous urticaria or gastrointestinal complaints (GICs) or diseases secondary to parasites/infections other than HP/ drug hypersensitivity
757	Disesase/s different from spontaneous urticaria or gastrointestinal complaints (GICs) or diseases secondary to parasites/infections other than HP/ drug hypersensitivity
758	Disesase/s different from spontaneous urticaria or gastrointestinal complaints (GICs) or diseases secondary to parasites/infections other than HP/ drug hypersensitivity
759	Disesase/s different from spontaneous urticaria or gastrointestinal complaints (GICs) or diseases secondary to parasites/infections other than HP/ drug hypersensitivity
760	Disesase/s different from spontaneous urticaria or gastrointestinal complaints (GICs) or diseases secondary to parasites/infections other than HP/ drug hypersensitivity
761	Disesase/s different from spontaneous urticaria or gastrointestinal complaints (GICs) or diseases secondary to parasites/infections other than HP/ drug hypersensitivity
762	Disesase/s different from spontaneous urticaria or gastrointestinal complaints (GICs) or diseases secondary to parasites/infections other than HP/ drug hypersensitivity
763	Disesase/s different from spontaneous urticaria or gastrointestinal complaints (GICs) or diseases secondary to parasites/infections other than HP/ drug hypersensitivity
764	Disesase/s different from spontaneous urticaria or gastrointestinal complaints (GICs) or diseases secondary to parasites/infections other than HP/ drug hypersensitivity
765	Disesase/s different from spontaneous urticaria or gastrointestinal complaints (GICs) or diseases secondary to parasites/infections other than HP/ drug hypersensitivity
766	Disesase/s different from spontaneous urticaria or gastrointestinal complaints (GICs) or diseases secondary to parasites/infections other than HP/ drug hypersensitivity
767	Disesase/s different from spontaneous urticaria or gastrointestinal complaints (GICs) or diseases secondary to parasites/infections other than HP/ drug hypersensitivity
768	Disesase/s different from spontaneous urticaria or gastrointestinal complaints (GICs) or diseases secondary to parasites/infections other than HP/ drug hypersensitivity
769	Disesase/s different from spontaneous urticaria or gastrointestinal complaints (GICs) or diseases secondary to parasites/infections other than HP/ drug hypersensitivity
770	Disesase/s different from spontaneous urticaria or gastrointestinal complaints (GICs) or diseases secondary to parasites/infections other than HP/ drug hypersensitivity
771	Disesase/s different from spontaneous urticaria or gastrointestinal complaints (GICs) or diseases secondary to parasites/infections other than HP/ drug hypersensitivity
772	Disesase/s different from spontaneous urticaria or gastrointestinal complaints (GICs) or diseases secondary to parasites/infections other than HP/ drug hypersensitivity
773	Disesase/s different from spontaneous urticaria or gastrointestinal complaints (GICs) or diseases secondary to parasites/infections other than HP/ drug hypersensitivity
774	Disesase/s different from spontaneous urticaria or gastrointestinal complaints (GICs) or diseases secondary to parasites/infections other than HP/ drug hypersensitivity
775	Disesase/s different from spontaneous urticaria or gastrointestinal complaints (GICs) or diseases secondary to parasites/infections other than HP/ drug hypersensitivity
776	Disesase/s different from spontaneous urticaria or gastrointestinal complaints (GICs) or diseases secondary to parasites/infections other than HP/ drug hypersensitivity
777	Disesase/s different from spontaneous urticaria or gastrointestinal complaints (GICs) or diseases secondary to parasites/infections other than HP/ drug hypersensitivity
778	Disesase/s different from spontaneous urticaria or gastrointestinal complaints (GICs) or diseases secondary to parasites/infections other than HP/ drug hypersensitivity
779	Disesase/s different from spontaneous urticaria or gastrointestinal complaints (GICs) or diseases secondary to parasites/infections other than HP/ drug hypersensitivity
780	Disesase/s different from spontaneous urticaria or gastrointestinal complaints (GICs) or diseases secondary to parasites/infections other than HP/ drug hypersensitivity
781	Disesase/s different from spontaneous urticaria or gastrointestinal complaints (GICs) or diseases secondary to parasites/infections other than HP/ drug hypersensitivity
782	Disesase/s different from spontaneous urticaria or gastrointestinal complaints (GICs) or diseases secondary to parasites/infections other than HP/ drug hypersensitivity
783	Disesase/s different from spontaneous urticaria or gastrointestinal complaints (GICs) or diseases secondary to parasites/infections other than HP/ drug hypersensitivity
784	Disesase/s different from spontaneous urticaria or gastrointestinal complaints (GICs) or diseases secondary to parasites/infections other than HP/ drug hypersensitivity
785	Disesase/s different from spontaneous urticaria or gastrointestinal complaints (GICs) or diseases secondary to parasites/infections other than HP/ drug hypersensitivity
786	Disesase/s different from spontaneous urticaria or gastrointestinal complaints (GICs) or diseases secondary to parasites/infections other than HP/ drug hypersensitivity
787	Disesase/s different from spontaneous urticaria or gastrointestinal complaints (GICs) or diseases secondary to parasites/infections other than HP/ drug hypersensitivity
788	Disesase/s different from spontaneous urticaria or gastrointestinal complaints (GICs) or diseases secondary to parasites/infections other than HP/ drug hypersensitivity
789	Disesase/s different from spontaneous urticaria or gastrointestinal complaints (GICs) or diseases secondary to parasites/infections other than HP/ drug hypersensitivity
790	Disesase/s different from spontaneous urticaria or gastrointestinal complaints (GICs) or diseases secondary to parasites/infections other than HP/ drug hypersensitivity
791	Disesase/s different from spontaneous urticaria or gastrointestinal complaints (GICs) or diseases secondary to parasites/infections other than HP/ drug hypersensitivity
792	Disesase/s different from spontaneous urticaria or gastrointestinal complaints (GICs) or diseases secondary to parasites/infections other than HP/ drug hypersensitivity
793	Disesase/s different from spontaneous urticaria or gastrointestinal complaints (GICs) or diseases secondary to parasites/infections other than HP/ drug hypersensitivity
794	Disesase/s different from spontaneous urticaria or gastrointestinal complaints (GICs) or diseases secondary to parasites/infections other than HP/ drug hypersensitivity
795	Disesase/s different from spontaneous urticaria or gastrointestinal complaints (GICs) or diseases secondary to parasites/infections other than HP/ drug hypersensitivity
796	Disesase/s different from spontaneous urticaria or gastrointestinal complaints (GICs) or diseases secondary to parasites/infections other than HP/ drug hypersensitivity
797	Disesase/s different from spontaneous urticaria or gastrointestinal complaints (GICs) or diseases secondary to parasites/infections other than HP/ drug hypersensitivity
798	Disesase/s different from spontaneous urticaria or gastrointestinal complaints (GICs) or diseases secondary to parasites/infections other than HP/ drug hypersensitivity
799	Disesase/s different from spontaneous urticaria or gastrointestinal complaints (GICs) or diseases secondary to parasites/infections other than HP/ drug hypersensitivity
800	Disesase/s different from spontaneous urticaria or gastrointestinal complaints (GICs) or diseases secondary to parasites/infections other than HP/ drug hypersensitivity
801	Disesase/s different from spontaneous urticaria or gastrointestinal complaints (GICs) or diseases secondary to parasites/infections other than HP/ drug hypersensitivity
802	Disesase/s different from spontaneous urticaria or gastrointestinal complaints (GICs) or diseases secondary to parasites/infections other than HP/ drug hypersensitivity
803	Disesase/s different from spontaneous urticaria or gastrointestinal complaints (GICs) or diseases secondary to parasites/infections other than HP/ drug hypersensitivity
804	Disesase/s different from spontaneous urticaria or gastrointestinal complaints (GICs) or diseases secondary to parasites/infections other than HP/ drug hypersensitivity
805	Disesase/s different from spontaneous urticaria or gastrointestinal complaints (GICs) or diseases secondary to parasites/infections other than HP/ drug hypersensitivity
806	Disesase/s different from spontaneous urticaria or gastrointestinal complaints (GICs) or diseases secondary to parasites/infections other than HP/ drug hypersensitivity
807	Disesase/s different from spontaneous urticaria or gastrointestinal complaints (GICs) or diseases secondary to parasites/infections other than HP/ drug hypersensitivity
808	Disesase/s different from spontaneous urticaria or gastrointestinal complaints (GICs) or diseases secondary to parasites/infections other than HP/ drug hypersensitivity
809	Disesase/s different from spontaneous urticaria or gastrointestinal complaints (GICs) or diseases secondary to parasites/infections other than HP/ drug hypersensitivity
810	Disesase/s different from spontaneous urticaria or gastrointestinal complaints (GICs) or diseases secondary to parasites/infections other than HP/ drug hypersensitivity
811	Disesase/s different from spontaneous urticaria or gastrointestinal complaints (GICs) or diseases secondary to parasites/infections other than HP/ drug hypersensitivity
812	Disesase/s different from spontaneous urticaria or gastrointestinal complaints (GICs) or diseases secondary to parasites/infections other than HP/ drug hypersensitivity
813	Disesase/s different from spontaneous urticaria or gastrointestinal complaints (GICs) or diseases secondary to parasites/infections other than HP/ drug hypersensitivity
814	Disesase/s different from spontaneous urticaria or gastrointestinal complaints (GICs) or diseases secondary to parasites/infections other than HP/ drug hypersensitivity
815	Disesase/s different from spontaneous urticaria or gastrointestinal complaints (GICs) or diseases secondary to parasites/infections other than HP/ drug hypersensitivity
816	Disesase/s different from spontaneous urticaria or gastrointestinal complaints (GICs) or diseases secondary to parasites/infections other than HP/ drug hypersensitivity
817	Disesase/s different from spontaneous urticaria or gastrointestinal complaints (GICs) or diseases secondary to parasites/infections other than HP/ drug hypersensitivity
818	Disesase/s different from spontaneous urticaria or gastrointestinal complaints (GICs) or diseases secondary to parasites/infections other than HP/ drug hypersensitivity
819	Disesase/s different from spontaneous urticaria or gastrointestinal complaints (GICs) or diseases secondary to parasites/infections other than HP/ drug hypersensitivity
820	Disesase/s different from spontaneous urticaria or gastrointestinal complaints (GICs) or diseases secondary to parasites/infections other than HP/ drug hypersensitivity
821	Disesase/s different from spontaneous urticaria or gastrointestinal complaints (GICs) or diseases secondary to parasites/infections other than HP/ drug hypersensitivity
822	Disesase/s different from spontaneous urticaria or gastrointestinal complaints (GICs) or diseases secondary to parasites/infections other than HP/ drug hypersensitivity
823	Disesase/s different from spontaneous urticaria or gastrointestinal complaints (GICs) or diseases secondary to parasites/infections other than HP/ drug hypersensitivity
824	Disesase/s different from spontaneous urticaria or gastrointestinal complaints (GICs) or diseases secondary to parasites/infections other than HP/ drug hypersensitivity
825	Disesase/s different from spontaneous urticaria or gastrointestinal complaints (GICs) or diseases secondary to parasites/infections other than HP/ drug hypersensitivity
826	Disesase/s different from spontaneous urticaria or gastrointestinal complaints (GICs) or diseases secondary to parasites/infections other than HP/ drug hypersensitivity
827	Disesase/s different from spontaneous urticaria or gastrointestinal complaints (GICs) or diseases secondary to parasites/infections other than HP/ drug hypersensitivity
828	Disesase/s different from spontaneous urticaria or gastrointestinal complaints (GICs) or diseases secondary to parasites/infections other than HP/ drug hypersensitivity
829	Disesase/s different from spontaneous urticaria or gastrointestinal complaints (GICs) or diseases secondary to parasites/infections other than HP/ drug hypersensitivity
830	Disesase/s different from spontaneous urticaria or gastrointestinal complaints (GICs) or diseases secondary to parasites/infections other than HP/ drug hypersensitivity
831	Disesase/s different from spontaneous urticaria or gastrointestinal complaints (GICs) or diseases secondary to parasites/infections other than HP/ drug hypersensitivity
832	Disesase/s different from spontaneous urticaria or gastrointestinal complaints (GICs) or diseases secondary to parasites/infections other than HP/ drug hypersensitivity
833	Disesase/s different from spontaneous urticaria or gastrointestinal complaints (GICs) or diseases secondary to parasites/infections other than HP/ drug hypersensitivity
834	Disesase/s different from spontaneous urticaria or gastrointestinal complaints (GICs) or diseases secondary to parasites/infections other than HP/ drug hypersensitivity
835	Disesase/s different from spontaneous urticaria or gastrointestinal complaints (GICs) or diseases secondary to parasites/infections other than HP/ drug hypersensitivity
836	Disesase/s different from spontaneous urticaria or gastrointestinal complaints (GICs) or diseases secondary to parasites/infections other than HP/ drug hypersensitivity
837	Disesase/s different from spontaneous urticaria or gastrointestinal complaints (GICs) or diseases secondary to parasites/infections other than HP/ drug hypersensitivity
838	Disesase/s different from spontaneous urticaria or gastrointestinal complaints (GICs) or diseases secondary to parasites/infections other than HP/ drug hypersensitivity
839	Disesase/s different from spontaneous urticaria or gastrointestinal complaints (GICs) or diseases secondary to parasites/infections other than HP/ drug hypersensitivity
840	Disesase/s different from spontaneous urticaria or gastrointestinal complaints (GICs) or diseases secondary to parasites/infections other than HP/ drug hypersensitivity
841	Disesase/s different from spontaneous urticaria or gastrointestinal complaints (GICs) or diseases secondary to parasites/infections other than HP/ drug hypersensitivity
842	Disesase/s different from spontaneous urticaria or gastrointestinal complaints (GICs) or diseases secondary to parasites/infections other than HP/ drug hypersensitivity
843	Disesase/s different from spontaneous urticaria or gastrointestinal complaints (GICs) or diseases secondary to parasites/infections other than HP/ drug hypersensitivity
844	Disesase/s different from spontaneous urticaria or gastrointestinal complaints (GICs) or diseases secondary to parasites/infections other than HP/ drug hypersensitivity
845	Disesase/s different from spontaneous urticaria or gastrointestinal complaints (GICs) or diseases secondary to parasites/infections other than HP/ drug hypersensitivity
846	Disesase/s different from spontaneous urticaria or gastrointestinal complaints (GICs) or diseases secondary to parasites/infections other than HP/ drug hypersensitivity
847	Disesase/s different from spontaneous urticaria or gastrointestinal complaints (GICs) or diseases secondary to parasites/infections other than HP/ drug hypersensitivity
848	Disesase/s different from spontaneous urticaria or gastrointestinal complaints (GICs) or diseases secondary to parasites/infections other than HP/ drug hypersensitivity
849	Disesase/s different from spontaneous urticaria or gastrointestinal complaints (GICs) or diseases secondary to parasites/infections other than HP/ drug hypersensitivity
850	Disesase/s different from spontaneous urticaria or gastrointestinal complaints (GICs) or diseases secondary to parasites/infections other than HP/ drug hypersensitivity
851	Disesase/s different from spontaneous urticaria or gastrointestinal complaints (GICs) or diseases secondary to parasites/infections other than HP/ drug hypersensitivity
852	Disesase/s different from spontaneous urticaria or gastrointestinal complaints (GICs) or diseases secondary to parasites/infections other than HP/ drug hypersensitivity
853	Disesase/s different from spontaneous urticaria or gastrointestinal complaints (GICs) or diseases secondary to parasites/infections other than HP/ drug hypersensitivity
854	Disesase/s different from spontaneous urticaria or gastrointestinal complaints (GICs) or diseases secondary to parasites/infections other than HP/ drug hypersensitivity
855	Disesase/s different from spontaneous urticaria or gastrointestinal complaints (GICs) or diseases secondary to parasites/infections other than HP/ drug hypersensitivity
856	Disesase/s different from spontaneous urticaria or gastrointestinal complaints (GICs) or diseases secondary to parasites/infections other than HP/ drug hypersensitivity
857	Disesase/s different from spontaneous urticaria or gastrointestinal complaints (GICs) or diseases secondary to parasites/infections other than HP/ drug hypersensitivity
858	Disesase/s different from spontaneous urticaria or gastrointestinal complaints (GICs) or diseases secondary to parasites/infections other than HP/ drug hypersensitivity
859	Disesase/s different from spontaneous urticaria or gastrointestinal complaints (GICs) or diseases secondary to parasites/infections other than HP/ drug hypersensitivity
860	Disesase/s different from spontaneous urticaria or gastrointestinal complaints (GICs) or diseases secondary to parasites/infections other than HP/ drug hypersensitivity
861	Disesase/s different from spontaneous urticaria or gastrointestinal complaints (GICs) or diseases secondary to parasites/infections other than HP/ drug hypersensitivity
862	Disesase/s different from spontaneous urticaria or gastrointestinal complaints (GICs) or diseases secondary to parasites/infections other than HP/ drug hypersensitivity
863	Disesase/s different from spontaneous urticaria or gastrointestinal complaints (GICs) or diseases secondary to parasites/infections other than HP/ drug hypersensitivity
864	Disesase/s different from spontaneous urticaria or gastrointestinal complaints (GICs) or diseases secondary to parasites/infections other than HP/ drug hypersensitivity
865	Disesase/s different from spontaneous urticaria or gastrointestinal complaints (GICs) or diseases secondary to parasites/infections other than HP/ drug hypersensitivity
866	Disesase/s different from spontaneous urticaria or gastrointestinal complaints (GICs) or diseases secondary to parasites/infections other than HP/ drug hypersensitivity
867	Disesase/s different from spontaneous urticaria or gastrointestinal complaints (GICs) or diseases secondary to parasites/infections other than HP/ drug hypersensitivity
868	Disesase/s different from spontaneous urticaria or gastrointestinal complaints (GICs) or diseases secondary to parasites/infections other than HP/ drug hypersensitivity
869	Disesase/s different from spontaneous urticaria or gastrointestinal complaints (GICs) or diseases secondary to parasites/infections other than HP/ drug hypersensitivity
870	Disesase/s different from spontaneous urticaria or gastrointestinal complaints (GICs) or diseases secondary to parasites/infections other than HP/ drug hypersensitivity
871	Disesase/s different from spontaneous urticaria or gastrointestinal complaints (GICs) or diseases secondary to parasites/infections other than HP/ drug hypersensitivity
872	Disesase/s different from spontaneous urticaria or gastrointestinal complaints (GICs) or diseases secondary to parasites/infections other than HP/ drug hypersensitivity
873	Disesase/s different from spontaneous urticaria or gastrointestinal complaints (GICs) or diseases secondary to parasites/infections other than HP/ drug hypersensitivity
874	Disesase/s different from spontaneous urticaria or gastrointestinal complaints (GICs) or diseases secondary to parasites/infections other than HP/ drug hypersensitivity
875	Disesase/s different from spontaneous urticaria or gastrointestinal complaints (GICs) or diseases secondary to parasites/infections other than HP/ drug hypersensitivity
876	Disesase/s different from spontaneous urticaria or gastrointestinal complaints (GICs) or diseases secondary to parasites/infections other than HP/ drug hypersensitivity
877	Disesase/s different from spontaneous urticaria or gastrointestinal complaints (GICs) or diseases secondary to parasites/infections other than HP/ drug hypersensitivity
878	Disesase/s different from spontaneous urticaria or gastrointestinal complaints (GICs) or diseases secondary to parasites/infections other than HP/ drug hypersensitivity
879	Disesase/s different from spontaneous urticaria or gastrointestinal complaints (GICs) or diseases secondary to parasites/infections other than HP/ drug hypersensitivity
880	Disesase/s different from spontaneous urticaria or gastrointestinal complaints (GICs) or diseases secondary to parasites/infections other than HP/ drug hypersensitivity
881	Disesase/s different from spontaneous urticaria or gastrointestinal complaints (GICs) or diseases secondary to parasites/infections other than HP/ drug hypersensitivity
882	Disesase/s different from spontaneous urticaria or gastrointestinal complaints (GICs) or diseases secondary to parasites/infections other than HP/ drug hypersensitivity
883	Disesase/s different from spontaneous urticaria or gastrointestinal complaints (GICs) or diseases secondary to parasites/infections other than HP/ drug hypersensitivity
884	Disesase/s different from spontaneous urticaria or gastrointestinal complaints (GICs) or diseases secondary to parasites/infections other than HP/ drug hypersensitivity
885	Disesase/s different from spontaneous urticaria or gastrointestinal complaints (GICs) or diseases secondary to parasites/infections other than HP/ drug hypersensitivity
886	Disesase/s different from spontaneous urticaria or gastrointestinal complaints (GICs) or diseases secondary to parasites/infections other than HP/ drug hypersensitivity
887	Disesase/s different from spontaneous urticaria or gastrointestinal complaints (GICs) or diseases secondary to parasites/infections other than HP/ drug hypersensitivity
888	Disesase/s different from spontaneous urticaria or gastrointestinal complaints (GICs) or diseases secondary to parasites/infections other than HP/ drug hypersensitivity
889	Disesase/s different from spontaneous urticaria or gastrointestinal complaints (GICs) or diseases secondary to parasites/infections other than HP/ drug hypersensitivity
890	Disesase/s different from spontaneous urticaria or gastrointestinal complaints (GICs) or diseases secondary to parasites/infections other than HP/ drug hypersensitivity
891	Disesase/s different from spontaneous urticaria or gastrointestinal complaints (GICs) or diseases secondary to parasites/infections other than HP/ drug hypersensitivity
892	Disesase/s different from spontaneous urticaria or gastrointestinal complaints (GICs) or diseases secondary to parasites/infections other than HP/ drug hypersensitivity
893	Disesase/s different from spontaneous urticaria or gastrointestinal complaints (GICs) or diseases secondary to parasites/infections other than HP/ drug hypersensitivity
894	Disesase/s different from spontaneous urticaria or gastrointestinal complaints (GICs) or diseases secondary to parasites/infections other than HP/ drug hypersensitivity
895	Disesase/s different from spontaneous urticaria or gastrointestinal complaints (GICs) or diseases secondary to parasites/infections other than HP/ drug hypersensitivity
896	Disesase/s different from spontaneous urticaria or gastrointestinal complaints (GICs) or diseases secondary to parasites/infections other than HP/ drug hypersensitivity
897	Disesase/s different from spontaneous urticaria or gastrointestinal complaints (GICs) or diseases secondary to parasites/infections other than HP/ drug hypersensitivity
898	Disesase/s different from spontaneous urticaria or gastrointestinal complaints (GICs) or diseases secondary to parasites/infections other than HP/ drug hypersensitivity
899	Disesase/s different from spontaneous urticaria or gastrointestinal complaints (GICs) or diseases secondary to parasites/infections other than HP/ drug hypersensitivity
900	Disesase/s different from spontaneous urticaria or gastrointestinal complaints (GICs) or diseases secondary to parasites/infections other than HP/ drug hypersensitivity
901	Disesase/s different from spontaneous urticaria or gastrointestinal complaints (GICs) or diseases secondary to parasites/infections other than HP/ drug hypersensitivity
902	Disesase/s different from spontaneous urticaria or gastrointestinal complaints (GICs) or diseases secondary to parasites/infections other than HP/ drug hypersensitivity
903	Disesase/s different from spontaneous urticaria or gastrointestinal complaints (GICs) or diseases secondary to parasites/infections other than HP/ drug hypersensitivity
904	Disesase/s different from spontaneous urticaria or gastrointestinal complaints (GICs) or diseases secondary to parasites/infections other than HP/ drug hypersensitivity
905	Disesase/s different from spontaneous urticaria or gastrointestinal complaints (GICs) or diseases secondary to parasites/infections other than HP/ drug hypersensitivity
906	Disesase/s different from spontaneous urticaria or gastrointestinal complaints (GICs) or diseases secondary to parasites/infections other than HP/ drug hypersensitivity
907	Disesase/s different from spontaneous urticaria or gastrointestinal complaints (GICs) or diseases secondary to parasites/infections other than HP/ drug hypersensitivity
908	Disesase/s different from spontaneous urticaria or gastrointestinal complaints (GICs) or diseases secondary to parasites/infections other than HP/ drug hypersensitivity
909	Disesase/s different from spontaneous urticaria or gastrointestinal complaints (GICs) or diseases secondary to parasites/infections other than HP/ drug hypersensitivity
910	Disesase/s different from spontaneous urticaria or gastrointestinal complaints (GICs) or diseases secondary to parasites/infections other than HP/ drug hypersensitivity
911	Disesase/s different from spontaneous urticaria or gastrointestinal complaints (GICs) or diseases secondary to parasites/infections other than HP/ drug hypersensitivity
912	Disesase/s different from spontaneous urticaria or gastrointestinal complaints (GICs) or diseases secondary to parasites/infections other than HP/ drug hypersensitivity
913	Disesase/s different from spontaneous urticaria or gastrointestinal complaints (GICs) or diseases secondary to parasites/infections other than HP/ drug hypersensitivity
914	Disesase/s different from spontaneous urticaria or gastrointestinal complaints (GICs) or diseases secondary to parasites/infections other than HP/ drug hypersensitivity
915	Disesase/s different from spontaneous urticaria or gastrointestinal complaints (GICs) or diseases secondary to parasites/infections other than HP/ drug hypersensitivity
916	Disesase/s different from spontaneous urticaria or gastrointestinal complaints (GICs) or diseases secondary to parasites/infections other than HP/ drug hypersensitivity
917	Disesase/s different from spontaneous urticaria or gastrointestinal complaints (GICs) or diseases secondary to parasites/infections other than HP/ drug hypersensitivity
918	Disesase/s different from spontaneous urticaria or gastrointestinal complaints (GICs) or diseases secondary to parasites/infections other than HP/ drug hypersensitivity
919	Disesase/s different from spontaneous urticaria or gastrointestinal complaints (GICs) or diseases secondary to parasites/infections other than HP/ drug hypersensitivity
920	Disesase/s different from spontaneous urticaria or gastrointestinal complaints (GICs) or diseases secondary to parasites/infections other than HP/ drug hypersensitivity
921	Disesase/s different from spontaneous urticaria or gastrointestinal complaints (GICs) or diseases secondary to parasites/infections other than HP/ drug hypersensitivity
922	Disesase/s different from spontaneous urticaria or gastrointestinal complaints (GICs) or diseases secondary to parasites/infections other than HP/ drug hypersensitivity
923	Disesase/s different from spontaneous urticaria or gastrointestinal complaints (GICs) or diseases secondary to parasites/infections other than HP/ drug hypersensitivity
924	Disesase/s different from spontaneous urticaria or gastrointestinal complaints (GICs) or diseases secondary to parasites/infections other than HP/ drug hypersensitivity
925	Disesase/s different from spontaneous urticaria or gastrointestinal complaints (GICs) or diseases secondary to parasites/infections other than HP/ drug hypersensitivity
926	Disesase/s different from spontaneous urticaria or gastrointestinal complaints (GICs) or diseases secondary to parasites/infections other than HP/ drug hypersensitivity
927	Disesase/s different from spontaneous urticaria or gastrointestinal complaints (GICs) or diseases secondary to parasites/infections other than HP/ drug hypersensitivity
928	Disesase/s different from spontaneous urticaria or gastrointestinal complaints (GICs) or diseases secondary to parasites/infections other than HP/ drug hypersensitivity
929	Disesase/s different from spontaneous urticaria or gastrointestinal complaints (GICs) or diseases secondary to parasites/infections other than HP/ drug hypersensitivity
930	Disesase/s different from spontaneous urticaria or gastrointestinal complaints (GICs) or diseases secondary to parasites/infections other than HP/ drug hypersensitivity
931	Disesase/s different from spontaneous urticaria or gastrointestinal complaints (GICs) or diseases secondary to parasites/infections other than HP/ drug hypersensitivity
932	Disesase/s different from spontaneous urticaria or gastrointestinal complaints (GICs) or diseases secondary to parasites/infections other than HP/ drug hypersensitivity
933	Disesase/s different from spontaneous urticaria or gastrointestinal complaints (GICs) or diseases secondary to parasites/infections other than HP/ drug hypersensitivity
934	Disesase/s different from spontaneous urticaria or gastrointestinal complaints (GICs) or diseases secondary to parasites/infections other than HP/ drug hypersensitivity
935	Disesase/s different from spontaneous urticaria or gastrointestinal complaints (GICs) or diseases secondary to parasites/infections other than HP/ drug hypersensitivity
936	Disesase/s different from spontaneous urticaria or gastrointestinal complaints (GICs) or diseases secondary to parasites/infections other than HP/ drug hypersensitivity
937	Disesase/s different from spontaneous urticaria or gastrointestinal complaints (GICs) or diseases secondary to parasites/infections other than HP/ drug hypersensitivity
938	Disesase/s different from spontaneous urticaria or gastrointestinal complaints (GICs) or diseases secondary to parasites/infections other than HP/ drug hypersensitivity
939	Disesase/s different from spontaneous urticaria or gastrointestinal complaints (GICs) or diseases secondary to parasites/infections other than HP/ drug hypersensitivity
940	Disesase/s different from spontaneous urticaria or gastrointestinal complaints (GICs) or diseases secondary to parasites/infections other than HP/ drug hypersensitivity
941	Disesase/s different from spontaneous urticaria or gastrointestinal complaints (GICs) or diseases secondary to parasites/infections other than HP/ drug hypersensitivity
942	Disesase/s different from spontaneous urticaria or gastrointestinal complaints (GICs) or diseases secondary to parasites/infections other than HP/ drug hypersensitivity
943	Disesase/s different from spontaneous urticaria or gastrointestinal complaints (GICs) or diseases secondary to parasites/infections other than HP/ drug hypersensitivity
944	Disesase/s different from spontaneous urticaria or gastrointestinal complaints (GICs) or diseases secondary to parasites/infections other than HP/ drug hypersensitivity
945	Disesase/s different from spontaneous urticaria or gastrointestinal complaints (GICs) or diseases secondary to parasites/infections other than HP/ drug hypersensitivity
946	Disesase/s different from spontaneous urticaria or gastrointestinal complaints (GICs) or diseases secondary to parasites/infections other than HP/ drug hypersensitivity
947	Disesase/s different from spontaneous urticaria or gastrointestinal complaints (GICs) or diseases secondary to parasites/infections other than HP/ drug hypersensitivity
948	Disesase/s different from spontaneous urticaria or gastrointestinal complaints (GICs) or diseases secondary to parasites/infections other than HP/ drug hypersensitivity
949	Disesase/s different from spontaneous urticaria or gastrointestinal complaints (GICs) or diseases secondary to parasites/infections other than HP/ drug hypersensitivity
950	Disesase/s different from spontaneous urticaria or gastrointestinal complaints (GICs) or diseases secondary to parasites/infections other than HP/ drug hypersensitivity
951	Disesase/s different from spontaneous urticaria or gastrointestinal complaints (GICs) or diseases secondary to parasites/infections other than HP/ drug hypersensitivity
952	Disesase/s different from spontaneous urticaria or gastrointestinal complaints (GICs) or diseases secondary to parasites/infections other than HP/ drug hypersensitivity
953	Disesase/s different from spontaneous urticaria or gastrointestinal complaints (GICs) or diseases secondary to parasites/infections other than HP/ drug hypersensitivity
954	Disesase/s different from spontaneous urticaria or gastrointestinal complaints (GICs) or diseases secondary to parasites/infections other than HP/ drug hypersensitivity
955	Disesase/s different from spontaneous urticaria or gastrointestinal complaints (GICs) or diseases secondary to parasites/infections other than HP/ drug hypersensitivity
956	Disesase/s different from spontaneous urticaria or gastrointestinal complaints (GICs) or diseases secondary to parasites/infections other than HP/ drug hypersensitivity
957	Disesase/s different from spontaneous urticaria or gastrointestinal complaints (GICs) or diseases secondary to parasites/infections other than HP/ drug hypersensitivity
958	Disesase/s different from spontaneous urticaria or gastrointestinal complaints (GICs) or diseases secondary to parasites/infections other than HP/ drug hypersensitivity
959	Disesase/s different from spontaneous urticaria or gastrointestinal complaints (GICs) or diseases secondary to parasites/infections other than HP/ drug hypersensitivity
960	Disesase/s different from spontaneous urticaria or gastrointestinal complaints (GICs) or diseases secondary to parasites/infections other than HP/ drug hypersensitivity
961	Disesase/s different from spontaneous urticaria or gastrointestinal complaints (GICs) or diseases secondary to parasites/infections other than HP/ drug hypersensitivity
962	Disesase/s different from spontaneous urticaria or gastrointestinal complaints (GICs) or diseases secondary to parasites/infections other than HP/ drug hypersensitivity
963	Disesase/s different from spontaneous urticaria or gastrointestinal complaints (GICs) or diseases secondary to parasites/infections other than HP/ drug hypersensitivity
964	Disesase/s different from spontaneous urticaria or gastrointestinal complaints (GICs) or diseases secondary to parasites/infections other than HP/ drug hypersensitivity
965	Disesase/s different from spontaneous urticaria or gastrointestinal complaints (GICs) or diseases secondary to parasites/infections other than HP/ drug hypersensitivity
966	Disesase/s different from spontaneous urticaria or gastrointestinal complaints (GICs) or diseases secondary to parasites/infections other than HP/ drug hypersensitivity
967	Disesase/s different from spontaneous urticaria or gastrointestinal complaints (GICs) or diseases secondary to parasites/infections other than HP/ drug hypersensitivity
968	Disesase/s different from spontaneous urticaria or gastrointestinal complaints (GICs) or diseases secondary to parasites/infections other than HP/ drug hypersensitivity
969	Disesase/s different from spontaneous urticaria or gastrointestinal complaints (GICs) or diseases secondary to parasites/infections other than HP/ drug hypersensitivity
970	Disesase/s different from spontaneous urticaria or gastrointestinal complaints (GICs) or diseases secondary to parasites/infections other than HP/ drug hypersensitivity
971	Disesase/s different from spontaneous urticaria or gastrointestinal complaints (GICs) or diseases secondary to parasites/infections other than HP/ drug hypersensitivity
972	Disesase/s different from spontaneous urticaria or gastrointestinal complaints (GICs) or diseases secondary to parasites/infections other than HP/ drug hypersensitivity
973	Disesase/s different from spontaneous urticaria or gastrointestinal complaints (GICs) or diseases secondary to parasites/infections other than HP/ drug hypersensitivity
974	Disesase/s different from spontaneous urticaria or gastrointestinal complaints (GICs) or diseases secondary to parasites/infections other than HP/ drug hypersensitivity
975	Disesase/s different from spontaneous urticaria or gastrointestinal complaints (GICs) or diseases secondary to parasites/infections other than HP/ drug hypersensitivity
976	Disesase/s different from spontaneous urticaria or gastrointestinal complaints (GICs) or diseases secondary to parasites/infections other than HP/ drug hypersensitivity
977	Disesase/s different from spontaneous urticaria or gastrointestinal complaints (GICs) or diseases secondary to parasites/infections other than HP/ drug hypersensitivity
978	Disesase/s different from spontaneous urticaria or gastrointestinal complaints (GICs) or diseases secondary to parasites/infections other than HP/ drug hypersensitivity
979	Disesase/s different from spontaneous urticaria or gastrointestinal complaints (GICs) or diseases secondary to parasites/infections other than HP/ drug hypersensitivity
980	Disesase/s different from spontaneous urticaria or gastrointestinal complaints (GICs) or diseases secondary to parasites/infections other than HP/ drug hypersensitivity
981	Disesase/s different from spontaneous urticaria or gastrointestinal complaints (GICs) or diseases secondary to parasites/infections other than HP/ drug hypersensitivity
982	Disesase/s different from spontaneous urticaria or gastrointestinal complaints (GICs) or diseases secondary to parasites/infections other than HP/ drug hypersensitivity
983	Disesase/s different from spontaneous urticaria or gastrointestinal complaints (GICs) or diseases secondary to parasites/infections other than HP/ drug hypersensitivity
984	Disesase/s different from spontaneous urticaria or gastrointestinal complaints (GICs) or diseases secondary to parasites/infections other than HP/ drug hypersensitivity
985	Disesase/s different from spontaneous urticaria or gastrointestinal complaints (GICs) or diseases secondary to parasites/infections other than HP/ drug hypersensitivity
986	Disesase/s different from spontaneous urticaria or gastrointestinal complaints (GICs) or diseases secondary to parasites/infections other than HP/ drug hypersensitivity
987	Disesase/s different from spontaneous urticaria or gastrointestinal complaints (GICs) or diseases secondary to parasites/infections other than HP/ drug hypersensitivity
988	Disesase/s different from spontaneous urticaria or gastrointestinal complaints (GICs) or diseases secondary to parasites/infections other than HP/ drug hypersensitivity
989	Disesase/s different from spontaneous urticaria or gastrointestinal complaints (GICs) or diseases secondary to parasites/infections other than HP/ drug hypersensitivity
990	Disesase/s different from spontaneous urticaria or gastrointestinal complaints (GICs) or diseases secondary to parasites/infections other than HP/ drug hypersensitivity
991	Disesase/s different from spontaneous urticaria or gastrointestinal complaints (GICs) or diseases secondary to parasites/infections other than HP/ drug hypersensitivity
992	Disesase/s different from spontaneous urticaria or gastrointestinal complaints (GICs) or diseases secondary to parasites/infections other than HP/ drug hypersensitivity
993	Disesase/s different from spontaneous urticaria or gastrointestinal complaints (GICs) or diseases secondary to parasites/infections other than HP/ drug hypersensitivity
994	Disesase/s different from spontaneous urticaria or gastrointestinal complaints (GICs) or diseases secondary to parasites/infections other than HP/ drug hypersensitivity
995	Disesase/s different from spontaneous urticaria or gastrointestinal complaints (GICs) or diseases secondary to parasites/infections other than HP/ drug hypersensitivity
996	Disesase/s different from spontaneous urticaria or gastrointestinal complaints (GICs) or diseases secondary to parasites/infections other than HP/ drug hypersensitivity
997	Disesase/s different from spontaneous urticaria or gastrointestinal complaints (GICs) or diseases secondary to parasites/infections other than HP/ drug hypersensitivity
998	Disesase/s different from spontaneous urticaria or gastrointestinal complaints (GICs) or diseases secondary to parasites/infections other than HP/ drug hypersensitivity
999	Disesase/s different from spontaneous urticaria or gastrointestinal complaints (GICs) or diseases secondary to parasites/infections other than HP/ drug hypersensitivity
1000	Disesase/s different from spontaneous urticaria or gastrointestinal complaints (GICs) or diseases secondary to parasites/infections other than HP/ drug hypersensitivity
1001	Disesase/s different from spontaneous urticaria or gastrointestinal complaints (GICs) or diseases secondary to parasites/infections other than HP/ drug hypersensitivity
1002	Disesase/s different from spontaneous urticaria or gastrointestinal complaints (GICs) or diseases secondary to parasites/infections other than HP/ drug hypersensitivity
1003	Disesase/s different from spontaneous urticaria or gastrointestinal complaints (GICs) or diseases secondary to parasites/infections other than HP/ drug hypersensitivity
1004	Disesase/s different from spontaneous urticaria or gastrointestinal complaints (GICs) or diseases secondary to parasites/infections other than HP/ drug hypersensitivity
1005	Disesase/s different from spontaneous urticaria or gastrointestinal complaints (GICs) or diseases secondary to parasites/infections other than HP/ drug hypersensitivity
1006	Disesase/s different from spontaneous urticaria or gastrointestinal complaints (GICs) or diseases secondary to parasites/infections other than HP/ drug hypersensitivity
1007	Disesase/s different from spontaneous urticaria or gastrointestinal complaints (GICs) or diseases secondary to parasites/infections other than HP/ drug hypersensitivity
1008	Disesase/s different from spontaneous urticaria or gastrointestinal complaints (GICs) or diseases secondary to parasites/infections other than HP/ drug hypersensitivity
1009	Disesase/s different from spontaneous urticaria or gastrointestinal complaints (GICs) or diseases secondary to parasites/infections other than HP/ drug hypersensitivity
1010	Disesase/s different from spontaneous urticaria or gastrointestinal complaints (GICs) or diseases secondary to parasites/infections other than HP/ drug hypersensitivity
1011	Disesase/s different from spontaneous urticaria or gastrointestinal complaints (GICs) or diseases secondary to parasites/infections other than HP/ drug hypersensitivity
1012	Disesase/s different from spontaneous urticaria or gastrointestinal complaints (GICs) or diseases secondary to parasites/infections other than HP/ drug hypersensitivity
1013	Disesase/s different from spontaneous urticaria or gastrointestinal complaints (GICs) or diseases secondary to parasites/infections other than HP/ drug hypersensitivity
1014	Disesase/s different from spontaneous urticaria or gastrointestinal complaints (GICs) or diseases secondary to parasites/infections other than HP/ drug hypersensitivity
1015	Disesase/s different from spontaneous urticaria or gastrointestinal complaints (GICs) or diseases secondary to parasites/infections other than HP/ drug hypersensitivity
1016	Disesase/s different from spontaneous urticaria or gastrointestinal complaints (GICs) or diseases secondary to parasites/infections other than HP/ drug hypersensitivity
1017	Disesase/s different from spontaneous urticaria or gastrointestinal complaints (GICs) or diseases secondary to parasites/infections other than HP/ drug hypersensitivity
1018	Disesase/s different from spontaneous urticaria or gastrointestinal complaints (GICs) or diseases secondary to parasites/infections other than HP/ drug hypersensitivity
1019	Disesase/s different from spontaneous urticaria or gastrointestinal complaints (GICs) or diseases secondary to parasites/infections other than HP/ drug hypersensitivity
1020	Disesase/s different from spontaneous urticaria or gastrointestinal complaints (GICs) or diseases secondary to parasites/infections other than HP/ drug hypersensitivity
1021	Disesase/s different from spontaneous urticaria or gastrointestinal complaints (GICs) or diseases secondary to parasites/infections other than HP/ drug hypersensitivity
1022	Disesase/s different from spontaneous urticaria or gastrointestinal complaints (GICs) or diseases secondary to parasites/infections other than HP/ drug hypersensitivity
1023	Disesase/s different from spontaneous urticaria or gastrointestinal complaints (GICs) or diseases secondary to parasites/infections other than HP/ drug hypersensitivity
1024	Disesase/s different from spontaneous urticaria or gastrointestinal complaints (GICs) or diseases secondary to parasites/infections other than HP/ drug hypersensitivity
1025	Disesase/s different from spontaneous urticaria or gastrointestinal complaints (GICs) or diseases secondary to parasites/infections other than HP/ drug hypersensitivity
1026	Disesase/s different from spontaneous urticaria or gastrointestinal complaints (GICs) or diseases secondary to parasites/infections other than HP/ drug hypersensitivity
1027	Disesase/s different from spontaneous urticaria or gastrointestinal complaints (GICs) or diseases secondary to parasites/infections other than HP/ drug hypersensitivity
1028	Disesase/s different from spontaneous urticaria or gastrointestinal complaints (GICs) or diseases secondary to parasites/infections other than HP/ drug hypersensitivity
1029	Disesase/s different from spontaneous urticaria or gastrointestinal complaints (GICs) or diseases secondary to parasites/infections other than HP/ drug hypersensitivity
1030	Disesase/s different from spontaneous urticaria or gastrointestinal complaints (GICs) or diseases secondary to parasites/infections other than HP/ drug hypersensitivity
1031	Disesase/s different from spontaneous urticaria or gastrointestinal complaints (GICs) or diseases secondary to parasites/infections other than HP/ drug hypersensitivity
1032	Disesase/s different from spontaneous urticaria or gastrointestinal complaints (GICs) or diseases secondary to parasites/infections other than HP/ drug hypersensitivity
1033	Disesase/s different from spontaneous urticaria or gastrointestinal complaints (GICs) or diseases secondary to parasites/infections other than HP/ drug hypersensitivity
1034	Disesase/s different from spontaneous urticaria or gastrointestinal complaints (GICs) or diseases secondary to parasites/infections other than HP/ drug hypersensitivity
1035	Disesase/s different from spontaneous urticaria or gastrointestinal complaints (GICs) or diseases secondary to parasites/infections other than HP/ drug hypersensitivity
1036	Disesase/s different from spontaneous urticaria or gastrointestinal complaints (GICs) or diseases secondary to parasites/infections other than HP/ drug hypersensitivity
1037	Disesase/s different from spontaneous urticaria or gastrointestinal complaints (GICs) or diseases secondary to parasites/infections other than HP/ drug hypersensitivity
1038	Disesase/s different from spontaneous urticaria or gastrointestinal complaints (GICs) or diseases secondary to parasites/infections other than HP/ drug hypersensitivity
1039	Disesase/s different from spontaneous urticaria or gastrointestinal complaints (GICs) or diseases secondary to parasites/infections other than HP/ drug hypersensitivity
1040	Disesase/s different from spontaneous urticaria or gastrointestinal complaints (GICs) or diseases secondary to parasites/infections other than HP/ drug hypersensitivity
1041	Disesase/s different from spontaneous urticaria or gastrointestinal complaints (GICs) or diseases secondary to parasites/infections other than HP/ drug hypersensitivity
1042	Disesase/s different from spontaneous urticaria or gastrointestinal complaints (GICs) or diseases secondary to parasites/infections other than HP/ drug hypersensitivity
1043	Disesase/s different from spontaneous urticaria or gastrointestinal complaints (GICs) or diseases secondary to parasites/infections other than HP/ drug hypersensitivity
1044	Disesase/s different from spontaneous urticaria or gastrointestinal complaints (GICs) or diseases secondary to parasites/infections other than HP/ drug hypersensitivity
1045	Disesase/s different from spontaneous urticaria or gastrointestinal complaints (GICs) or diseases secondary to parasites/infections other than HP/ drug hypersensitivity
1046	Disesase/s different from spontaneous urticaria or gastrointestinal complaints (GICs) or diseases secondary to parasites/infections other than HP/ drug hypersensitivity
1047	Disesase/s different from spontaneous urticaria or gastrointestinal complaints (GICs) or diseases secondary to parasites/infections other than HP/ drug hypersensitivity
1048	Disesase/s different from spontaneous urticaria or gastrointestinal complaints (GICs) or diseases secondary to parasites/infections other than HP/ drug hypersensitivity
1049	Disesase/s different from spontaneous urticaria or gastrointestinal complaints (GICs) or diseases secondary to parasites/infections other than HP/ drug hypersensitivity
1050	Disesase/s different from spontaneous urticaria or gastrointestinal complaints (GICs) or diseases secondary to parasites/infections other than HP/ drug hypersensitivity
1051	Disesase/s different from spontaneous urticaria or gastrointestinal complaints (GICs) or diseases secondary to parasites/infections other than HP/ drug hypersensitivity
1052	Disesase/s different from spontaneous urticaria or gastrointestinal complaints (GICs) or diseases secondary to parasites/infections other than HP/ drug hypersensitivity
1053	Disesase/s different from spontaneous urticaria or gastrointestinal complaints (GICs) or diseases secondary to parasites/infections other than HP/ drug hypersensitivity
1054	Disesase/s different from spontaneous urticaria or gastrointestinal complaints (GICs) or diseases secondary to parasites/infections other than HP/ drug hypersensitivity
1055	Disesase/s different from spontaneous urticaria or gastrointestinal complaints (GICs) or diseases secondary to parasites/infections other than HP/ drug hypersensitivity
1056	Disesase/s different from spontaneous urticaria or gastrointestinal complaints (GICs) or diseases secondary to parasites/infections other than HP/ drug hypersensitivity
1057	Disesase/s different from spontaneous urticaria or gastrointestinal complaints (GICs) or diseases secondary to parasites/infections other than HP/ drug hypersensitivity
1058	Disesase/s different from spontaneous urticaria or gastrointestinal complaints (GICs) or diseases secondary to parasites/infections other than HP/ drug hypersensitivity
1059	Disesase/s different from spontaneous urticaria or gastrointestinal complaints (GICs) or diseases secondary to parasites/infections other than HP/ drug hypersensitivity
1060	Disesase/s different from spontaneous urticaria or gastrointestinal complaints (GICs) or diseases secondary to parasites/infections other than HP/ drug hypersensitivity
1061	Disesase/s different from spontaneous urticaria or gastrointestinal complaints (GICs) or diseases secondary to parasites/infections other than HP/ drug hypersensitivity
1062	Disesase/s different from spontaneous urticaria or gastrointestinal complaints (GICs) or diseases secondary to parasites/infections other than HP/ drug hypersensitivity
1063	Disesase/s different from spontaneous urticaria or gastrointestinal complaints (GICs) or diseases secondary to parasites/infections other than HP/ drug hypersensitivity
1064	Disesase/s different from spontaneous urticaria or gastrointestinal complaints (GICs) or diseases secondary to parasites/infections other than HP/ drug hypersensitivity
1065	Disesase/s different from spontaneous urticaria or gastrointestinal complaints (GICs) or diseases secondary to parasites/infections other than HP/ drug hypersensitivity
1066	Disesase/s different from spontaneous urticaria or gastrointestinal complaints (GICs) or diseases secondary to parasites/infections other than HP/ drug hypersensitivity
1067	Disesase/s different from spontaneous urticaria or gastrointestinal complaints (GICs) or diseases secondary to parasites/infections other than HP/ drug hypersensitivity
1068	Disesase/s different from spontaneous urticaria or gastrointestinal complaints (GICs) or diseases secondary to parasites/infections other than HP/ drug hypersensitivity
1069	Disesase/s different from spontaneous urticaria or gastrointestinal complaints (GICs) or diseases secondary to parasites/infections other than HP/ drug hypersensitivity
1070	Disesase/s different from spontaneous urticaria or gastrointestinal complaints (GICs) or diseases secondary to parasites/infections other than HP/ drug hypersensitivity
1071	Disesase/s different from spontaneous urticaria or gastrointestinal complaints (GICs) or diseases secondary to parasites/infections other than HP/ drug hypersensitivity
1072	Disesase/s different from spontaneous urticaria or gastrointestinal complaints (GICs) or diseases secondary to parasites/infections other than HP/ drug hypersensitivity
1073	Disesase/s different from spontaneous urticaria or gastrointestinal complaints (GICs) or diseases secondary to parasites/infections other than HP/ drug hypersensitivity
1074	Disesase/s different from spontaneous urticaria or gastrointestinal complaints (GICs) or diseases secondary to parasites/infections other than HP/ drug hypersensitivity
1075	Disesase/s different from spontaneous urticaria or gastrointestinal complaints (GICs) or diseases secondary to parasites/infections other than HP/ drug hypersensitivity
1076	Disesase/s different from spontaneous urticaria or gastrointestinal complaints (GICs) or diseases secondary to parasites/infections other than HP/ drug hypersensitivity
1077	Disesase/s different from spontaneous urticaria or gastrointestinal complaints (GICs) or diseases secondary to parasites/infections other than HP/ drug hypersensitivity
1078	Disesase/s different from spontaneous urticaria or gastrointestinal complaints (GICs) or diseases secondary to parasites/infections other than HP/ drug hypersensitivity
1079	Disesase/s different from spontaneous urticaria or gastrointestinal complaints (GICs) or diseases secondary to parasites/infections other than HP/ drug hypersensitivity
1080	Disesase/s different from spontaneous urticaria or gastrointestinal complaints (GICs) or diseases secondary to parasites/infections other than HP/ drug hypersensitivity
1081	Disesase/s different from spontaneous urticaria or gastrointestinal complaints (GICs) or diseases secondary to parasites/infections other than HP/ drug hypersensitivity
1082	Disesase/s different from spontaneous urticaria or gastrointestinal complaints (GICs) or diseases secondary to parasites/infections other than HP/ drug hypersensitivity
1083	Disesase/s different from spontaneous urticaria or gastrointestinal complaints (GICs) or diseases secondary to parasites/infections other than HP/ drug hypersensitivity
1084	Disesase/s different from spontaneous urticaria or gastrointestinal complaints (GICs) or diseases secondary to parasites/infections other than HP/ drug hypersensitivity
1085	Disesase/s different from spontaneous urticaria or gastrointestinal complaints (GICs) or diseases secondary to parasites/infections other than HP/ drug hypersensitivity
1086	Disesase/s different from spontaneous urticaria or gastrointestinal complaints (GICs) or diseases secondary to parasites/infections other than HP/ drug hypersensitivity
1087	Disesase/s different from spontaneous urticaria or gastrointestinal complaints (GICs) or diseases secondary to parasites/infections other than HP/ drug hypersensitivity
1088	Disesase/s different from spontaneous urticaria or gastrointestinal complaints (GICs) or diseases secondary to parasites/infections other than HP/ drug hypersensitivity
1089	Disesase/s different from spontaneous urticaria or gastrointestinal complaints (GICs) or diseases secondary to parasites/infections other than HP/ drug hypersensitivity
1090	Disesase/s different from spontaneous urticaria or gastrointestinal complaints (GICs) or diseases secondary to parasites/infections other than HP/ drug hypersensitivity
1091	Disesase/s different from spontaneous urticaria or gastrointestinal complaints (GICs) or diseases secondary to parasites/infections other than HP/ drug hypersensitivity
1092	Disesase/s different from spontaneous urticaria or gastrointestinal complaints (GICs) or diseases secondary to parasites/infections other than HP/ drug hypersensitivity
1093	Disesase/s different from spontaneous urticaria or gastrointestinal complaints (GICs) or diseases secondary to parasites/infections other than HP/ drug hypersensitivity
1094	Disesase/s different from spontaneous urticaria or gastrointestinal complaints (GICs) or diseases secondary to parasites/infections other than HP/ drug hypersensitivity
1095	Disesase/s different from spontaneous urticaria or gastrointestinal complaints (GICs) or diseases secondary to parasites/infections other than HP/ drug hypersensitivity
1096	Disesase/s different from spontaneous urticaria or gastrointestinal complaints (GICs) or diseases secondary to parasites/infections other than HP/ drug hypersensitivity
1097	Disesase/s different from spontaneous urticaria or gastrointestinal complaints (GICs) or diseases secondary to parasites/infections other than HP/ drug hypersensitivity
1098	Disesase/s different from spontaneous urticaria or gastrointestinal complaints (GICs) or diseases secondary to parasites/infections other than HP/ drug hypersensitivity
1099	Disesase/s different from spontaneous urticaria or gastrointestinal complaints (GICs) or diseases secondary to parasites/infections other than HP/ drug hypersensitivity
1100	Disesase/s different from spontaneous urticaria or gastrointestinal complaints (GICs) or diseases secondary to parasites/infections other than HP/ drug hypersensitivity
1101	Disesase/s different from spontaneous urticaria or gastrointestinal complaints (GICs) or diseases secondary to parasites/infections other than HP/ drug hypersensitivity
1102	Disesase/s different from spontaneous urticaria or gastrointestinal complaints (GICs) or diseases secondary to parasites/infections other than HP/ drug hypersensitivity
1103	Disesase/s different from spontaneous urticaria or gastrointestinal complaints (GICs) or diseases secondary to parasites/infections other than HP/ drug hypersensitivity
1104	Disesase/s different from spontaneous urticaria or gastrointestinal complaints (GICs) or diseases secondary to parasites/infections other than HP/ drug hypersensitivity
1105	Disesase/s different from spontaneous urticaria or gastrointestinal complaints (GICs) or diseases secondary to parasites/infections other than HP/ drug hypersensitivity
1106	Disesase/s different from spontaneous urticaria or gastrointestinal complaints (GICs) or diseases secondary to parasites/infections other than HP/ drug hypersensitivity
1107	Disesase/s different from spontaneous urticaria or gastrointestinal complaints (GICs) or diseases secondary to parasites/infections other than HP/ drug hypersensitivity
1108	Disesase/s different from spontaneous urticaria or gastrointestinal complaints (GICs) or diseases secondary to parasites/infections other than HP/ drug hypersensitivity
1109	Disesase/s different from spontaneous urticaria or gastrointestinal complaints (GICs) or diseases secondary to parasites/infections other than HP/ drug hypersensitivity
1110	Disesase/s different from spontaneous urticaria or gastrointestinal complaints (GICs) or diseases secondary to parasites/infections other than HP/ drug hypersensitivity
1111	Disesase/s different from spontaneous urticaria or gastrointestinal complaints (GICs) or diseases secondary to parasites/infections other than HP/ drug hypersensitivity
1112	Disesase/s different from spontaneous urticaria or gastrointestinal complaints (GICs) or diseases secondary to parasites/infections other than HP/ drug hypersensitivity
1113	Disesase/s different from spontaneous urticaria or gastrointestinal complaints (GICs) or diseases secondary to parasites/infections other than HP/ drug hypersensitivity
1114	Disesase/s different from spontaneous urticaria or gastrointestinal complaints (GICs) or diseases secondary to parasites/infections other than HP/ drug hypersensitivity
1115	Disesase/s different from spontaneous urticaria or gastrointestinal complaints (GICs) or diseases secondary to parasites/infections other than HP/ drug hypersensitivity
1116	Disesase/s different from spontaneous urticaria or gastrointestinal complaints (GICs) or diseases secondary to parasites/infections other than HP/ drug hypersensitivity
1117	Disesase/s different from spontaneous urticaria or gastrointestinal complaints (GICs) or diseases secondary to parasites/infections other than HP/ drug hypersensitivity
1118	Disesase/s different from spontaneous urticaria or gastrointestinal complaints (GICs) or diseases secondary to parasites/infections other than HP/ drug hypersensitivity
1119	Disesase/s different from spontaneous urticaria or gastrointestinal complaints (GICs) or diseases secondary to parasites/infections other than HP/ drug hypersensitivity
1120	Disesase/s different from spontaneous urticaria or gastrointestinal complaints (GICs) or diseases secondary to parasites/infections other than HP/ drug hypersensitivity
1121	Disesase/s different from spontaneous urticaria or gastrointestinal complaints (GICs) or diseases secondary to parasites/infections other than HP/ drug hypersensitivity
1122	Disesase/s different from spontaneous urticaria or gastrointestinal complaints (GICs) or diseases secondary to parasites/infections other than HP/ drug hypersensitivity
1123	Disesase/s different from spontaneous urticaria or gastrointestinal complaints (GICs) or diseases secondary to parasites/infections other than HP/ drug hypersensitivity
1124	Disesase/s different from spontaneous urticaria or gastrointestinal complaints (GICs) or diseases secondary to parasites/infections other than HP/ drug hypersensitivity
1125	Disesase/s different from spontaneous urticaria or gastrointestinal complaints (GICs) or diseases secondary to parasites/infections other than HP/ drug hypersensitivity
1126	Disesase/s different from spontaneous urticaria or gastrointestinal complaints (GICs) or diseases secondary to parasites/infections other than HP/ drug hypersensitivity
1127	Disesase/s different from spontaneous urticaria or gastrointestinal complaints (GICs) or diseases secondary to parasites/infections other than HP/ drug hypersensitivity
1128	Disesase/s different from spontaneous urticaria or gastrointestinal complaints (GICs) or diseases secondary to parasites/infections other than HP/ drug hypersensitivity
1129	Disesase/s different from spontaneous urticaria or gastrointestinal complaints (GICs) or diseases secondary to parasites/infections other than HP/ drug hypersensitivity
1130	Disesase/s different from spontaneous urticaria or gastrointestinal complaints (GICs) or diseases secondary to parasites/infections other than HP/ drug hypersensitivity
1131	Disesase/s different from spontaneous urticaria or gastrointestinal complaints (GICs) or diseases secondary to parasites/infections other than HP/ drug hypersensitivity
1132	Disesase/s different from spontaneous urticaria or gastrointestinal complaints (GICs) or diseases secondary to parasites/infections other than HP/ drug hypersensitivity
1133	Disesase/s different from spontaneous urticaria or gastrointestinal complaints (GICs) or diseases secondary to parasites/infections other than HP/ drug hypersensitivity
1134	Disesase/s different from spontaneous urticaria or gastrointestinal complaints (GICs) or diseases secondary to parasites/infections other than HP/ drug hypersensitivity
1135	Disesase/s different from spontaneous urticaria or gastrointestinal complaints (GICs) or diseases secondary to parasites/infections other than HP/ drug hypersensitivity
1136	Disesase/s different from spontaneous urticaria or gastrointestinal complaints (GICs) or diseases secondary to parasites/infections other than HP/ drug hypersensitivity
1137	Disesase/s different from spontaneous urticaria or gastrointestinal complaints (GICs) or diseases secondary to parasites/infections other than HP/ drug hypersensitivity
1138	Disesase/s different from spontaneous urticaria or gastrointestinal complaints (GICs) or diseases secondary to parasites/infections other than HP/ drug hypersensitivity
1139	Disesase/s different from spontaneous urticaria or gastrointestinal complaints (GICs) or diseases secondary to parasites/infections other than HP/ drug hypersensitivity
1140	Disesase/s different from spontaneous urticaria or gastrointestinal complaints (GICs) or diseases secondary to parasites/infections other than HP/ drug hypersensitivity
1141	Disesase/s different from spontaneous urticaria or gastrointestinal complaints (GICs) or diseases secondary to parasites/infections other than HP/ drug hypersensitivity
1142	Disesase/s different from spontaneous urticaria or gastrointestinal complaints (GICs) or diseases secondary to parasites/infections other than HP/ drug hypersensitivity
1143	Disesase/s different from spontaneous urticaria or gastrointestinal complaints (GICs) or diseases secondary to parasites/infections other than HP/ drug hypersensitivity
1144	Disesase/s different from spontaneous urticaria or gastrointestinal complaints (GICs) or diseases secondary to parasites/infections other than HP/ drug hypersensitivity
1145	Disesase/s different from spontaneous urticaria or gastrointestinal complaints (GICs) or diseases secondary to parasites/infections other than HP/ drug hypersensitivity
1146	Disesase/s different from spontaneous urticaria or gastrointestinal complaints (GICs) or diseases secondary to parasites/infections other than HP/ drug hypersensitivity
1147	Disesase/s different from spontaneous urticaria or gastrointestinal complaints (GICs) or diseases secondary to parasites/infections other than HP/ drug hypersensitivity
1148	Disesase/s different from spontaneous urticaria or gastrointestinal complaints (GICs) or diseases secondary to parasites/infections other than HP/ drug hypersensitivity
1149	Disesase/s different from spontaneous urticaria or gastrointestinal complaints (GICs) or diseases secondary to parasites/infections other than HP/ drug hypersensitivity
1150	Disesase/s different from spontaneous urticaria or gastrointestinal complaints (GICs) or diseases secondary to parasites/infections other than HP/ drug hypersensitivity
1151	Disesase/s different from spontaneous urticaria or gastrointestinal complaints (GICs) or diseases secondary to parasites/infections other than HP/ drug hypersensitivity
1152	Disesase/s different from spontaneous urticaria or gastrointestinal complaints (GICs) or diseases secondary to parasites/infections other than HP/ drug hypersensitivity
1153	Disesase/s different from spontaneous urticaria or gastrointestinal complaints (GICs) or diseases secondary to parasites/infections other than HP/ drug hypersensitivity
1154	Disesase/s different from spontaneous urticaria or gastrointestinal complaints (GICs) or diseases secondary to parasites/infections other than HP/ drug hypersensitivity
1155	Disesase/s different from spontaneous urticaria or gastrointestinal complaints (GICs) or diseases secondary to parasites/infections other than HP/ drug hypersensitivity
1156	Disesase/s different from spontaneous urticaria or gastrointestinal complaints (GICs) or diseases secondary to parasites/infections other than HP/ drug hypersensitivity
1157	Disesase/s different from spontaneous urticaria or gastrointestinal complaints (GICs) or diseases secondary to parasites/infections other than HP/ drug hypersensitivity
1158	Disesase/s different from spontaneous urticaria or gastrointestinal complaints (GICs) or diseases secondary to parasites/infections other than HP/ drug hypersensitivity
1159	Disesase/s different from spontaneous urticaria or gastrointestinal complaints (GICs) or diseases secondary to parasites/infections other than HP/ drug hypersensitivity
1160	Disesase/s different from spontaneous urticaria or gastrointestinal complaints (GICs) or diseases secondary to parasites/infections other than HP/ drug hypersensitivity
1161	Disesase/s different from spontaneous urticaria or gastrointestinal complaints (GICs) or diseases secondary to parasites/infections other than HP/ drug hypersensitivity
1162	Disesase/s different from spontaneous urticaria or gastrointestinal complaints (GICs) or diseases secondary to parasites/infections other than HP/ drug hypersensitivity
1163	Disesase/s different from spontaneous urticaria or gastrointestinal complaints (GICs) or diseases secondary to parasites/infections other than HP/ drug hypersensitivity
1164	Disesase/s different from spontaneous urticaria or gastrointestinal complaints (GICs) or diseases secondary to parasites/infections other than HP/ drug hypersensitivity
1165	Disesase/s different from spontaneous urticaria or gastrointestinal complaints (GICs) or diseases secondary to parasites/infections other than HP/ drug hypersensitivity
1166	Disesase/s different from spontaneous urticaria or gastrointestinal complaints (GICs) or diseases secondary to parasites/infections other than HP/ drug hypersensitivity
1167	Disesase/s different from spontaneous urticaria or gastrointestinal complaints (GICs) or diseases secondary to parasites/infections other than HP/ drug hypersensitivity
1168	Disesase/s different from spontaneous urticaria or gastrointestinal complaints (GICs) or diseases secondary to parasites/infections other than HP/ drug hypersensitivity
1169	Disesase/s different from spontaneous urticaria or gastrointestinal complaints (GICs) or diseases secondary to parasites/infections other than HP/ drug hypersensitivity
1170	Disesase/s different from spontaneous urticaria or gastrointestinal complaints (GICs) or diseases secondary to parasites/infections other than HP/ drug hypersensitivity
1171	Disesase/s different from spontaneous urticaria or gastrointestinal complaints (GICs) or diseases secondary to parasites/infections other than HP/ drug hypersensitivity
1172	Disesase/s different from spontaneous urticaria or gastrointestinal complaints (GICs) or diseases secondary to parasites/infections other than HP/ drug hypersensitivity
1173	Disesase/s different from spontaneous urticaria or gastrointestinal complaints (GICs) or diseases secondary to parasites/infections other than HP/ drug hypersensitivity
1174	Disesase/s different from spontaneous urticaria or gastrointestinal complaints (GICs) or diseases secondary to parasites/infections other than HP/ drug hypersensitivity
1175	Disesase/s different from spontaneous urticaria or gastrointestinal complaints (GICs) or diseases secondary to parasites/infections other than HP/ drug hypersensitivity
1176	Disesase/s different from spontaneous urticaria or gastrointestinal complaints (GICs) or diseases secondary to parasites/infections other than HP/ drug hypersensitivity
1177	Disesase/s different from spontaneous urticaria or gastrointestinal complaints (GICs) or diseases secondary to parasites/infections other than HP/ drug hypersensitivity
1178	Disesase/s different from spontaneous urticaria or gastrointestinal complaints (GICs) or diseases secondary to parasites/infections other than HP/ drug hypersensitivity
1179	Disesase/s different from spontaneous urticaria or gastrointestinal complaints (GICs) or diseases secondary to parasites/infections other than HP/ drug hypersensitivity
1180	Disesase/s different from spontaneous urticaria or gastrointestinal complaints (GICs) or diseases secondary to parasites/infections other than HP/ drug hypersensitivity
1181	Disesase/s different from spontaneous urticaria or gastrointestinal complaints (GICs) or diseases secondary to parasites/infections other than HP/ drug hypersensitivity
1182	Disesase/s different from spontaneous urticaria or gastrointestinal complaints (GICs) or diseases secondary to parasites/infections other than HP/ drug hypersensitivity
1183	Disesase/s different from spontaneous urticaria or gastrointestinal complaints (GICs) or diseases secondary to parasites/infections other than HP/ drug hypersensitivity
1184	Disesase/s different from spontaneous urticaria or gastrointestinal complaints (GICs) or diseases secondary to parasites/infections other than HP/ drug hypersensitivity
1185	Disesase/s different from spontaneous urticaria or gastrointestinal complaints (GICs) or diseases secondary to parasites/infections other than HP/ drug hypersensitivity
1186	Disesase/s different from spontaneous urticaria or gastrointestinal complaints (GICs) or diseases secondary to parasites/infections other than HP/ drug hypersensitivity
1187	Disesase/s different from spontaneous urticaria or gastrointestinal complaints (GICs) or diseases secondary to parasites/infections other than HP/ drug hypersensitivity
1188	Disesase/s different from spontaneous urticaria or gastrointestinal complaints (GICs) or diseases secondary to parasites/infections other than HP/ drug hypersensitivity
1189	Disesase/s different from spontaneous urticaria or gastrointestinal complaints (GICs) or diseases secondary to parasites/infections other than HP/ drug hypersensitivity
1190	Disesase/s different from spontaneous urticaria or gastrointestinal complaints (GICs) or diseases secondary to parasites/infections other than HP/ drug hypersensitivity
1191	Disesase/s different from spontaneous urticaria or gastrointestinal complaints (GICs) or diseases secondary to parasites/infections other than HP/ drug hypersensitivity
1192	Disesase/s different from spontaneous urticaria or gastrointestinal complaints (GICs) or diseases secondary to parasites/infections other than HP/ drug hypersensitivity
1193	Disesase/s different from spontaneous urticaria or gastrointestinal complaints (GICs) or diseases secondary to parasites/infections other than HP/ drug hypersensitivity
1194	Disesase/s different from spontaneous urticaria or gastrointestinal complaints (GICs) or diseases secondary to parasites/infections other than HP/ drug hypersensitivity
1195	Disesase/s different from spontaneous urticaria or gastrointestinal complaints (GICs) or diseases secondary to parasites/infections other than HP/ drug hypersensitivity
1196	Disesase/s different from spontaneous urticaria or gastrointestinal complaints (GICs) or diseases secondary to parasites/infections other than HP/ drug hypersensitivity
1197	Disesase/s different from spontaneous urticaria or gastrointestinal complaints (GICs) or diseases secondary to parasites/infections other than HP/ drug hypersensitivity
1198	Disesase/s different from spontaneous urticaria or gastrointestinal complaints (GICs) or diseases secondary to parasites/infections other than HP/ drug hypersensitivity
1199	Disesase/s different from spontaneous urticaria or gastrointestinal complaints (GICs) or diseases secondary to parasites/infections other than HP/ drug hypersensitivity
1200	Disesase/s different from spontaneous urticaria or gastrointestinal complaints (GICs) or diseases secondary to parasites/infections other than HP/ drug hypersensitivity
1201	Disesase/s different from spontaneous urticaria or gastrointestinal complaints (GICs) or diseases secondary to parasites/infections other than HP/ drug hypersensitivity
1202	Disesase/s different from spontaneous urticaria or gastrointestinal complaints (GICs) or diseases secondary to parasites/infections other than HP/ drug hypersensitivity
1203	Disesase/s different from spontaneous urticaria or gastrointestinal complaints (GICs) or diseases secondary to parasites/infections other than HP/ drug hypersensitivity
1204	Disesase/s different from spontaneous urticaria or gastrointestinal complaints (GICs) or diseases secondary to parasites/infections other than HP/ drug hypersensitivity
1205	Disesase/s different from spontaneous urticaria or gastrointestinal complaints (GICs) or diseases secondary to parasites/infections other than HP/ drug hypersensitivity
1206	Disesase/s different from spontaneous urticaria or gastrointestinal complaints (GICs) or diseases secondary to parasites/infections other than HP/ drug hypersensitivity
1207	Disesase/s different from spontaneous urticaria or gastrointestinal complaints (GICs) or diseases secondary to parasites/infections other than HP/ drug hypersensitivity
1208	Disesase/s different from spontaneous urticaria or gastrointestinal complaints (GICs) or diseases secondary to parasites/infections other than HP/ drug hypersensitivity
1209	Disesase/s different from spontaneous urticaria or gastrointestinal complaints (GICs) or diseases secondary to parasites/infections other than HP/ drug hypersensitivity
1210	Disesase/s different from spontaneous urticaria or gastrointestinal complaints (GICs) or diseases secondary to parasites/infections other than HP/ drug hypersensitivity
1211	Disesase/s different from spontaneous urticaria or gastrointestinal complaints (GICs) or diseases secondary to parasites/infections other than HP/ drug hypersensitivity
1212	Disesase/s different from spontaneous urticaria or gastrointestinal complaints (GICs) or diseases secondary to parasites/infections other than HP/ drug hypersensitivity
1213	Disesase/s different from spontaneous urticaria or gastrointestinal complaints (GICs) or diseases secondary to parasites/infections other than HP/ drug hypersensitivity
1214	Disesase/s different from spontaneous urticaria or gastrointestinal complaints (GICs) or diseases secondary to parasites/infections other than HP/ drug hypersensitivity
1215	Disesase/s different from spontaneous urticaria or gastrointestinal complaints (GICs) or diseases secondary to parasites/infections other than HP/ drug hypersensitivity
1216	Disesase/s different from spontaneous urticaria or gastrointestinal complaints (GICs) or diseases secondary to parasites/infections other than HP/ drug hypersensitivity
1217	Disesase/s different from spontaneous urticaria or gastrointestinal complaints (GICs) or diseases secondary to parasites/infections other than HP/ drug hypersensitivity
1218	Disesase/s different from spontaneous urticaria or gastrointestinal complaints (GICs) or diseases secondary to parasites/infections other than HP/ drug hypersensitivity
1219	Disesase/s different from spontaneous urticaria or gastrointestinal complaints (GICs) or diseases secondary to parasites/infections other than HP/ drug hypersensitivity
1220	Disesase/s different from spontaneous urticaria or gastrointestinal complaints (GICs) or diseases secondary to parasites/infections other than HP/ drug hypersensitivity
1221	Disesase/s different from spontaneous urticaria or gastrointestinal complaints (GICs) or diseases secondary to parasites/infections other than HP/ drug hypersensitivity
1222	Disesase/s different from spontaneous urticaria or gastrointestinal complaints (GICs) or diseases secondary to parasites/infections other than HP/ drug hypersensitivity
1223	Disesase/s different from spontaneous urticaria or gastrointestinal complaints (GICs) or diseases secondary to parasites/infections other than HP/ drug hypersensitivity
1224	Disesase/s different from spontaneous urticaria or gastrointestinal complaints (GICs) or diseases secondary to parasites/infections other than HP/ drug hypersensitivity
1225	Disesase/s different from spontaneous urticaria or gastrointestinal complaints (GICs) or diseases secondary to parasites/infections other than HP/ drug hypersensitivity
1226	Disesase/s different from spontaneous urticaria or gastrointestinal complaints (GICs) or diseases secondary to parasites/infections other than HP/ drug hypersensitivity
1227	Disesase/s different from spontaneous urticaria or gastrointestinal complaints (GICs) or diseases secondary to parasites/infections other than HP/ drug hypersensitivity
1228	Disesase/s different from spontaneous urticaria or gastrointestinal complaints (GICs) or diseases secondary to parasites/infections other than HP/ drug hypersensitivity
1229	Disesase/s different from spontaneous urticaria or gastrointestinal complaints (GICs) or diseases secondary to parasites/infections other than HP/ drug hypersensitivity
1230	Disesase/s different from spontaneous urticaria or gastrointestinal complaints (GICs) or diseases secondary to parasites/infections other than HP/ drug hypersensitivity
1231	Disesase/s different from spontaneous urticaria or gastrointestinal complaints (GICs) or diseases secondary to parasites/infections other than HP/ drug hypersensitivity
1232	Disesase/s different from spontaneous urticaria or gastrointestinal complaints (GICs) or diseases secondary to parasites/infections other than HP/ drug hypersensitivity
1233	Disesase/s different from spontaneous urticaria or gastrointestinal complaints (GICs) or diseases secondary to parasites/infections other than HP/ drug hypersensitivity
1234	Disesase/s different from spontaneous urticaria or gastrointestinal complaints (GICs) or diseases secondary to parasites/infections other than HP/ drug hypersensitivity
1235	Disesase/s different from spontaneous urticaria or gastrointestinal complaints (GICs) or diseases secondary to parasites/infections other than HP/ drug hypersensitivity
1236	Disesase/s different from spontaneous urticaria or gastrointestinal complaints (GICs) or diseases secondary to parasites/infections other than HP/ drug hypersensitivity
1237	Disesase/s different from spontaneous urticaria or gastrointestinal complaints (GICs) or diseases secondary to parasites/infections other than HP/ drug hypersensitivity
1238	Disesase/s different from spontaneous urticaria or gastrointestinal complaints (GICs) or diseases secondary to parasites/infections other than HP/ drug hypersensitivity
1239	Disesase/s different from spontaneous urticaria or gastrointestinal complaints (GICs) or diseases secondary to parasites/infections other than HP/ drug hypersensitivity
1240	Disesase/s different from spontaneous urticaria or gastrointestinal complaints (GICs) or diseases secondary to parasites/infections other than HP/ drug hypersensitivity
1241	Disesase/s different from spontaneous urticaria or gastrointestinal complaints (GICs) or diseases secondary to parasites/infections other than HP/ drug hypersensitivity
1242	Disesase/s different from spontaneous urticaria or gastrointestinal complaints (GICs) or diseases secondary to parasites/infections other than HP/ drug hypersensitivity
1243	Disesase/s different from spontaneous urticaria or gastrointestinal complaints (GICs) or diseases secondary to parasites/infections other than HP/ drug hypersensitivity
1244	Disesase/s different from spontaneous urticaria or gastrointestinal complaints (GICs) or diseases secondary to parasites/infections other than HP/ drug hypersensitivity
1245	Disesase/s different from spontaneous urticaria or gastrointestinal complaints (GICs) or diseases secondary to parasites/infections other than HP/ drug hypersensitivity
1246	Disesase/s different from spontaneous urticaria or gastrointestinal complaints (GICs) or diseases secondary to parasites/infections other than HP/ drug hypersensitivity
1247	Disesase/s different from spontaneous urticaria or gastrointestinal complaints (GICs) or diseases secondary to parasites/infections other than HP/ drug hypersensitivity
1248	Disesase/s different from spontaneous urticaria or gastrointestinal complaints (GICs) or diseases secondary to parasites/infections other than HP/ drug hypersensitivity
1249	Disesase/s different from spontaneous urticaria or gastrointestinal complaints (GICs) or diseases secondary to parasites/infections other than HP/ drug hypersensitivity
1250	Disesase/s different from spontaneous urticaria or gastrointestinal complaints (GICs) or diseases secondary to parasites/infections other than HP/ drug hypersensitivity
1251	Disesase/s different from spontaneous urticaria or gastrointestinal complaints (GICs) or diseases secondary to parasites/infections other than HP/ drug hypersensitivity
1252	Disesase/s different from spontaneous urticaria or gastrointestinal complaints (GICs) or diseases secondary to parasites/infections other than HP/ drug hypersensitivity
1253	Disesase/s different from spontaneous urticaria or gastrointestinal complaints (GICs) or diseases secondary to parasites/infections other than HP/ drug hypersensitivity
1254	Disesase/s different from spontaneous urticaria or gastrointestinal complaints (GICs) or diseases secondary to parasites/infections other than HP/ drug hypersensitivity
1255	Disesase/s different from spontaneous urticaria or gastrointestinal complaints (GICs) or diseases secondary to parasites/infections other than HP/ drug hypersensitivity
1256	Disesase/s different from spontaneous urticaria or gastrointestinal complaints (GICs) or diseases secondary to parasites/infections other than HP/ drug hypersensitivity
1257	Disesase/s different from spontaneous urticaria or gastrointestinal complaints (GICs) or diseases secondary to parasites/infections other than HP/ drug hypersensitivity
1258	Disesase/s different from spontaneous urticaria or gastrointestinal complaints (GICs) or diseases secondary to parasites/infections other than HP/ drug hypersensitivity
1259	Disesase/s different from spontaneous urticaria or gastrointestinal complaints (GICs) or diseases secondary to parasites/infections other than HP/ drug hypersensitivity
1260	Disesase/s different from spontaneous urticaria or gastrointestinal complaints (GICs) or diseases secondary to parasites/infections other than HP/ drug hypersensitivity
1261	Disesase/s different from spontaneous urticaria or gastrointestinal complaints (GICs) or diseases secondary to parasites/infections other than HP/ drug hypersensitivity
1262	Disesase/s different from spontaneous urticaria or gastrointestinal complaints (GICs) or diseases secondary to parasites/infections other than HP/ drug hypersensitivity
1263	Disesase/s different from spontaneous urticaria or gastrointestinal complaints (GICs) or diseases secondary to parasites/infections other than HP/ drug hypersensitivity
1264	Disesase/s different from spontaneous urticaria or gastrointestinal complaints (GICs) or diseases secondary to parasites/infections other than HP/ drug hypersensitivity
1265	Disesase/s different from spontaneous urticaria or gastrointestinal complaints (GICs) or diseases secondary to parasites/infections other than HP/ drug hypersensitivity
1266	Disesase/s different from spontaneous urticaria or gastrointestinal complaints (GICs) or diseases secondary to parasites/infections other than HP/ drug hypersensitivity
1267	Disesase/s different from spontaneous urticaria or gastrointestinal complaints (GICs) or diseases secondary to parasites/infections other than HP/ drug hypersensitivity
1268	Disesase/s different from spontaneous urticaria or gastrointestinal complaints (GICs) or diseases secondary to parasites/infections other than HP/ drug hypersensitivity
1269	Disesase/s different from spontaneous urticaria or gastrointestinal complaints (GICs) or diseases secondary to parasites/infections other than HP/ drug hypersensitivity
1270	Disesase/s different from spontaneous urticaria or gastrointestinal complaints (GICs) or diseases secondary to parasites/infections other than HP/ drug hypersensitivity
1271	Disesase/s different from spontaneous urticaria or gastrointestinal complaints (GICs) or diseases secondary to parasites/infections other than HP/ drug hypersensitivity
1272	Disesase/s different from spontaneous urticaria or gastrointestinal complaints (GICs) or diseases secondary to parasites/infections other than HP/ drug hypersensitivity
1273	Disesase/s different from spontaneous urticaria or gastrointestinal complaints (GICs) or diseases secondary to parasites/infections other than HP/ drug hypersensitivity
1274	Disesase/s different from spontaneous urticaria or gastrointestinal complaints (GICs) or diseases secondary to parasites/infections other than HP/ drug hypersensitivity
1275	Disesase/s different from spontaneous urticaria or gastrointestinal complaints (GICs) or diseases secondary to parasites/infections other than HP/ drug hypersensitivity
1276	Disesase/s different from spontaneous urticaria or gastrointestinal complaints (GICs) or diseases secondary to parasites/infections other than HP/ drug hypersensitivity
1277	Disesase/s different from spontaneous urticaria or gastrointestinal complaints (GICs) or diseases secondary to parasites/infections other than HP/ drug hypersensitivity
1278	Disesase/s different from spontaneous urticaria or gastrointestinal complaints (GICs) or diseases secondary to parasites/infections other than HP/ drug hypersensitivity
1279	Disesase/s different from spontaneous urticaria or gastrointestinal complaints (GICs) or diseases secondary to parasites/infections other than HP/ drug hypersensitivity
1280	Disesase/s different from spontaneous urticaria or gastrointestinal complaints (GICs) or diseases secondary to parasites/infections other than HP/ drug hypersensitivity
1281	Disesase/s different from spontaneous urticaria or gastrointestinal complaints (GICs) or diseases secondary to parasites/infections other than HP/ drug hypersensitivity
1282	Disesase/s different from spontaneous urticaria or gastrointestinal complaints (GICs) or diseases secondary to parasites/infections other than HP/ drug hypersensitivity
1283	Disesase/s different from spontaneous urticaria or gastrointestinal complaints (GICs) or diseases secondary to parasites/infections other than HP/ drug hypersensitivity
1284	Disesase/s different from spontaneous urticaria or gastrointestinal complaints (GICs) or diseases secondary to parasites/infections other than HP/ drug hypersensitivity
1285	Disesase/s different from spontaneous urticaria or gastrointestinal complaints (GICs) or diseases secondary to parasites/infections other than HP/ drug hypersensitivity
1286	Disesase/s different from spontaneous urticaria or gastrointestinal complaints (GICs) or diseases secondary to parasites/infections other than HP/ drug hypersensitivity
1287	Disesase/s different from spontaneous urticaria or gastrointestinal complaints (GICs) or diseases secondary to parasites/infections other than HP/ drug hypersensitivity
1288	Disesase/s different from spontaneous urticaria or gastrointestinal complaints (GICs) or diseases secondary to parasites/infections other than HP/ drug hypersensitivity
1289	Disesase/s different from spontaneous urticaria or gastrointestinal complaints (GICs) or diseases secondary to parasites/infections other than HP/ drug hypersensitivity
1290	Disesase/s different from spontaneous urticaria or gastrointestinal complaints (GICs) or diseases secondary to parasites/infections other than HP/ drug hypersensitivity
1291	Disesase/s different from spontaneous urticaria or gastrointestinal complaints (GICs) or diseases secondary to parasites/infections other than HP/ drug hypersensitivity
1292	Disesase/s different from spontaneous urticaria or gastrointestinal complaints (GICs) or diseases secondary to parasites/infections other than HP/ drug hypersensitivity
1293	Disesase/s different from spontaneous urticaria or gastrointestinal complaints (GICs) or diseases secondary to parasites/infections other than HP/ drug hypersensitivity
1294	Disesase/s different from spontaneous urticaria or gastrointestinal complaints (GICs) or diseases secondary to parasites/infections other than HP/ drug hypersensitivity
1295	Disesase/s different from spontaneous urticaria or gastrointestinal complaints (GICs) or diseases secondary to parasites/infections other than HP/ drug hypersensitivity
1296	Disesase/s different from spontaneous urticaria or gastrointestinal complaints (GICs) or diseases secondary to parasites/infections other than HP/ drug hypersensitivity
1297	Disesase/s different from spontaneous urticaria or gastrointestinal complaints (GICs) or diseases secondary to parasites/infections other than HP/ drug hypersensitivity
1298	Disesase/s different from spontaneous urticaria or gastrointestinal complaints (GICs) or diseases secondary to parasites/infections other than HP/ drug hypersensitivity
1299	Disesase/s different from spontaneous urticaria or gastrointestinal complaints (GICs) or diseases secondary to parasites/infections other than HP/ drug hypersensitivity
1300	Disesase/s different from spontaneous urticaria or gastrointestinal complaints (GICs) or diseases secondary to parasites/infections other than HP/ drug hypersensitivity
1301	Disesase/s different from spontaneous urticaria or gastrointestinal complaints (GICs) or diseases secondary to parasites/infections other than HP/ drug hypersensitivity
1302	Disesase/s different from spontaneous urticaria or gastrointestinal complaints (GICs) or diseases secondary to parasites/infections other than HP/ drug hypersensitivity
1303	Disesase/s different from spontaneous urticaria or gastrointestinal complaints (GICs) or diseases secondary to parasites/infections other than HP/ drug hypersensitivity
1304	Disesase/s different from spontaneous urticaria or gastrointestinal complaints (GICs) or diseases secondary to parasites/infections other than HP/ drug hypersensitivity
1305	Disesase/s different from spontaneous urticaria or gastrointestinal complaints (GICs) or diseases secondary to parasites/infections other than HP/ drug hypersensitivity
1306	Disesase/s different from spontaneous urticaria or gastrointestinal complaints (GICs) or diseases secondary to parasites/infections other than HP/ drug hypersensitivity
1307	Disesase/s different from spontaneous urticaria or gastrointestinal complaints (GICs) or diseases secondary to parasites/infections other than HP/ drug hypersensitivity
1308	Disesase/s different from spontaneous urticaria or gastrointestinal complaints (GICs) or diseases secondary to parasites/infections other than HP/ drug hypersensitivity
1309	Disesase/s different from spontaneous urticaria or gastrointestinal complaints (GICs) or diseases secondary to parasites/infections other than HP/ drug hypersensitivity
1310	Disesase/s different from spontaneous urticaria or gastrointestinal complaints (GICs) or diseases secondary to parasites/infections other than HP/ drug hypersensitivity
1311	Disesase/s different from spontaneous urticaria or gastrointestinal complaints (GICs) or diseases secondary to parasites/infections other than HP/ drug hypersensitivity
1312	Disesase/s different from spontaneous urticaria or gastrointestinal complaints (GICs) or diseases secondary to parasites/infections other than HP/ drug hypersensitivity
1313	Disesase/s different from spontaneous urticaria or gastrointestinal complaints (GICs) or diseases secondary to parasites/infections other than HP/ drug hypersensitivity
1314	Disesase/s different from spontaneous urticaria or gastrointestinal complaints (GICs) or diseases secondary to parasites/infections other than HP/ drug hypersensitivity
1315	Disesase/s different from spontaneous urticaria or gastrointestinal complaints (GICs) or diseases secondary to parasites/infections other than HP/ drug hypersensitivity
1316	Disesase/s different from spontaneous urticaria or gastrointestinal complaints (GICs) or diseases secondary to parasites/infections other than HP/ drug hypersensitivity
1317	Disesase/s different from spontaneous urticaria or gastrointestinal complaints (GICs) or diseases secondary to parasites/infections other than HP/ drug hypersensitivity
1318	Disesase/s different from spontaneous urticaria or gastrointestinal complaints (GICs) or diseases secondary to parasites/infections other than HP/ drug hypersensitivity
1319	Disesase/s different from spontaneous urticaria or gastrointestinal complaints (GICs) or diseases secondary to parasites/infections other than HP/ drug hypersensitivity
1320	Disesase/s different from spontaneous urticaria or gastrointestinal complaints (GICs) or diseases secondary to parasites/infections other than HP/ drug hypersensitivity
1321	Disesase/s different from spontaneous urticaria or gastrointestinal complaints (GICs) or diseases secondary to parasites/infections other than HP/ drug hypersensitivity
1322	Disesase/s different from spontaneous urticaria or gastrointestinal complaints (GICs) or diseases secondary to parasites/infections other than HP/ drug hypersensitivity
1323	Disesase/s different from spontaneous urticaria or gastrointestinal complaints (GICs) or diseases secondary to parasites/infections other than HP/ drug hypersensitivity
1324	Disesase/s different from spontaneous urticaria or gastrointestinal complaints (GICs) or diseases secondary to parasites/infections other than HP/ drug hypersensitivity
1325	Disesase/s different from spontaneous urticaria or gastrointestinal complaints (GICs) or diseases secondary to parasites/infections other than HP/ drug hypersensitivity
1326	Disesase/s different from spontaneous urticaria or gastrointestinal complaints (GICs) or diseases secondary to parasites/infections other than HP/ drug hypersensitivity
1327	Disesase/s different from spontaneous urticaria or gastrointestinal complaints (GICs) or diseases secondary to parasites/infections other than HP/ drug hypersensitivity
1328	Disesase/s different from spontaneous urticaria or gastrointestinal complaints (GICs) or diseases secondary to parasites/infections other than HP/ drug hypersensitivity
1329	Disesase/s different from spontaneous urticaria or gastrointestinal complaints (GICs) or diseases secondary to parasites/infections other than HP/ drug hypersensitivity
1330	Disesase/s different from spontaneous urticaria or gastrointestinal complaints (GICs) or diseases secondary to parasites/infections other than HP/ drug hypersensitivity
1331	Disesase/s different from spontaneous urticaria or gastrointestinal complaints (GICs) or diseases secondary to parasites/infections other than HP/ drug hypersensitivity
1332	Disesase/s different from spontaneous urticaria or gastrointestinal complaints (GICs) or diseases secondary to parasites/infections other than HP/ drug hypersensitivity
1333	Disesase/s different from spontaneous urticaria or gastrointestinal complaints (GICs) or diseases secondary to parasites/infections other than HP/ drug hypersensitivity
1334	Disesase/s different from spontaneous urticaria or gastrointestinal complaints (GICs) or diseases secondary to parasites/infections other than HP/ drug hypersensitivity
1335	Disesase/s different from spontaneous urticaria or gastrointestinal complaints (GICs) or diseases secondary to parasites/infections other than HP/ drug hypersensitivity
1336	Disesase/s different from spontaneous urticaria or gastrointestinal complaints (GICs) or diseases secondary to parasites/infections other than HP/ drug hypersensitivity
1337	Disesase/s different from spontaneous urticaria or gastrointestinal complaints (GICs) or diseases secondary to parasites/infections other than HP/ drug hypersensitivity
1338	Disesase/s different from spontaneous urticaria or gastrointestinal complaints (GICs) or diseases secondary to parasites/infections other than HP/ drug hypersensitivity
1339	Disesase/s different from spontaneous urticaria or gastrointestinal complaints (GICs) or diseases secondary to parasites/infections other than HP/ drug hypersensitivity
1340	Disesase/s different from spontaneous urticaria or gastrointestinal complaints (GICs) or diseases secondary to parasites/infections other than HP/ drug hypersensitivity
1341	Disesase/s different from spontaneous urticaria or gastrointestinal complaints (GICs) or diseases secondary to parasites/infections other than HP/ drug hypersensitivity
1342	Disesase/s different from spontaneous urticaria or gastrointestinal complaints (GICs) or diseases secondary to parasites/infections other than HP/ drug hypersensitivity
1343	Disesase/s different from spontaneous urticaria or gastrointestinal complaints (GICs) or diseases secondary to parasites/infections other than HP/ drug hypersensitivity
1344	Disesase/s different from spontaneous urticaria or gastrointestinal complaints (GICs) or diseases secondary to parasites/infections other than HP/ drug hypersensitivity
1345	Disesase/s different from spontaneous urticaria or gastrointestinal complaints (GICs) or diseases secondary to parasites/infections other than HP/ drug hypersensitivity
1346	Disesase/s different from spontaneous urticaria or gastrointestinal complaints (GICs) or diseases secondary to parasites/infections other than HP/ drug hypersensitivity
1347	Disesase/s different from spontaneous urticaria or gastrointestinal complaints (GICs) or diseases secondary to parasites/infections other than HP/ drug hypersensitivity
1348	Disesase/s different from spontaneous urticaria or gastrointestinal complaints (GICs) or diseases secondary to parasites/infections other than HP/ drug hypersensitivity
1349	Disesase/s different from spontaneous urticaria or gastrointestinal complaints (GICs) or diseases secondary to parasites/infections other than HP/ drug hypersensitivity
1350	Disesase/s different from spontaneous urticaria or gastrointestinal complaints (GICs) or diseases secondary to parasites/infections other than HP/ drug hypersensitivity
1351	Disesase/s different from spontaneous urticaria or gastrointestinal complaints (GICs) or diseases secondary to parasites/infections other than HP/ drug hypersensitivity
1352	Disesase/s different from spontaneous urticaria or gastrointestinal complaints (GICs) or diseases secondary to parasites/infections other than HP/ drug hypersensitivity
1353	Disesase/s different from spontaneous urticaria or gastrointestinal complaints (GICs) or diseases secondary to parasites/infections other than HP/ drug hypersensitivity
1354	Disesase/s different from spontaneous urticaria or gastrointestinal complaints (GICs) or diseases secondary to parasites/infections other than HP/ drug hypersensitivity
1355	Disesase/s different from spontaneous urticaria or gastrointestinal complaints (GICs) or diseases secondary to parasites/infections other than HP/ drug hypersensitivity
1356	Disesase/s different from spontaneous urticaria or gastrointestinal complaints (GICs) or diseases secondary to parasites/infections other than HP/ drug hypersensitivity
1357	Disesase/s different from spontaneous urticaria or gastrointestinal complaints (GICs) or diseases secondary to parasites/infections other than HP/ drug hypersensitivity
1358	Disesase/s different from spontaneous urticaria or gastrointestinal complaints (GICs) or diseases secondary to parasites/infections other than HP/ drug hypersensitivity
1359	Disesase/s different from spontaneous urticaria or gastrointestinal complaints (GICs) or diseases secondary to parasites/infections other than HP/ drug hypersensitivity
1360	Disesase/s different from spontaneous urticaria or gastrointestinal complaints (GICs) or diseases secondary to parasites/infections other than HP/ drug hypersensitivity
1361	Disesase/s different from spontaneous urticaria or gastrointestinal complaints (GICs) or diseases secondary to parasites/infections other than HP/ drug hypersensitivity
1362	Disesase/s different from spontaneous urticaria or gastrointestinal complaints (GICs) or diseases secondary to parasites/infections other than HP/ drug hypersensitivity
1363	Disesase/s different from spontaneous urticaria or gastrointestinal complaints (GICs) or diseases secondary to parasites/infections other than HP/ drug hypersensitivity
1364	Disesase/s different from spontaneous urticaria or gastrointestinal complaints (GICs) or diseases secondary to parasites/infections other than HP/ drug hypersensitivity
1365	Disesase/s different from spontaneous urticaria or gastrointestinal complaints (GICs) or diseases secondary to parasites/infections other than HP/ drug hypersensitivity
1366	Disesase/s different from spontaneous urticaria or gastrointestinal complaints (GICs) or diseases secondary to parasites/infections other than HP/ drug hypersensitivity
1367	Disesase/s different from spontaneous urticaria or gastrointestinal complaints (GICs) or diseases secondary to parasites/infections other than HP/ drug hypersensitivity
1368	Disesase/s different from spontaneous urticaria or gastrointestinal complaints (GICs) or diseases secondary to parasites/infections other than HP/ drug hypersensitivity
1369	Disesase/s different from spontaneous urticaria or gastrointestinal complaints (GICs) or diseases secondary to parasites/infections other than HP/ drug hypersensitivity
1370	Disesase/s different from spontaneous urticaria or gastrointestinal complaints (GICs) or diseases secondary to parasites/infections other than HP/ drug hypersensitivity
1371	Disesase/s different from spontaneous urticaria or gastrointestinal complaints (GICs) or diseases secondary to parasites/infections other than HP/ drug hypersensitivity
1372	Disesase/s different from spontaneous urticaria or gastrointestinal complaints (GICs) or diseases secondary to parasites/infections other than HP/ drug hypersensitivity
1373	Disesase/s different from spontaneous urticaria or gastrointestinal complaints (GICs) or diseases secondary to parasites/infections other than HP/ drug hypersensitivity
1374	Disesase/s different from spontaneous urticaria or gastrointestinal complaints (GICs) or diseases secondary to parasites/infections other than HP/ drug hypersensitivity
1375	Disesase/s different from spontaneous urticaria or gastrointestinal complaints (GICs) or diseases secondary to parasites/infections other than HP/ drug hypersensitivity
1376	Disesase/s different from spontaneous urticaria or gastrointestinal complaints (GICs) or diseases secondary to parasites/infections other than HP/ drug hypersensitivity
1377	Disesase/s different from spontaneous urticaria or gastrointestinal complaints (GICs) or diseases secondary to parasites/infections other than HP/ drug hypersensitivity
1378	Disesase/s different from spontaneous urticaria or gastrointestinal complaints (GICs) or diseases secondary to parasites/infections other than HP/ drug hypersensitivity
1379	Disesase/s different from spontaneous urticaria or gastrointestinal complaints (GICs) or diseases secondary to parasites/infections other than HP/ drug hypersensitivity
1380	Disesase/s different from spontaneous urticaria or gastrointestinal complaints (GICs) or diseases secondary to parasites/infections other than HP/ drug hypersensitivity
1381	Disesase/s different from spontaneous urticaria or gastrointestinal complaints (GICs) or diseases secondary to parasites/infections other than HP/ drug hypersensitivity
1382	Disesase/s different from spontaneous urticaria or gastrointestinal complaints (GICs) or diseases secondary to parasites/infections other than HP/ drug hypersensitivity
1383	Disesase/s different from spontaneous urticaria or gastrointestinal complaints (GICs) or diseases secondary to parasites/infections other than HP/ drug hypersensitivity
1384	Disesase/s different from spontaneous urticaria or gastrointestinal complaints (GICs) or diseases secondary to parasites/infections other than HP/ drug hypersensitivity
1385	Disesase/s different from spontaneous urticaria or gastrointestinal complaints (GICs) or diseases secondary to parasites/infections other than HP/ drug hypersensitivity
1386	Disesase/s different from spontaneous urticaria or gastrointestinal complaints (GICs) or diseases secondary to parasites/infections other than HP/ drug hypersensitivity
1387	Disesase/s different from spontaneous urticaria or gastrointestinal complaints (GICs) or diseases secondary to parasites/infections other than HP/ drug hypersensitivity
1388	Disesase/s different from spontaneous urticaria or gastrointestinal complaints (GICs) or diseases secondary to parasites/infections other than HP/ drug hypersensitivity
1389	Disesase/s different from spontaneous urticaria or gastrointestinal complaints (GICs) or diseases secondary to parasites/infections other than HP/ drug hypersensitivity
1390	Disesase/s different from spontaneous urticaria or gastrointestinal complaints (GICs) or diseases secondary to parasites/infections other than HP/ drug hypersensitivity
1391	Disesase/s different from spontaneous urticaria or gastrointestinal complaints (GICs) or diseases secondary to parasites/infections other than HP/ drug hypersensitivity
1392	Disesase/s different from spontaneous urticaria or gastrointestinal complaints (GICs) or diseases secondary to parasites/infections other than HP/ drug hypersensitivity
1393	Disesase/s different from spontaneous urticaria or gastrointestinal complaints (GICs) or diseases secondary to parasites/infections other than HP/ drug hypersensitivity
1394	Disesase/s different from spontaneous urticaria or gastrointestinal complaints (GICs) or diseases secondary to parasites/infections other than HP/ drug hypersensitivity
1395	Disesase/s different from spontaneous urticaria or gastrointestinal complaints (GICs) or diseases secondary to parasites/infections other than HP/ drug hypersensitivity
1396	Disesase/s different from spontaneous urticaria or gastrointestinal complaints (GICs) or diseases secondary to parasites/infections other than HP/ drug hypersensitivity
1397	Disesase/s different from spontaneous urticaria or gastrointestinal complaints (GICs) or diseases secondary to parasites/infections other than HP/ drug hypersensitivity
1398	Disesase/s different from spontaneous urticaria or gastrointestinal complaints (GICs) or diseases secondary to parasites/infections other than HP/ drug hypersensitivity
1399	Disesase/s different from spontaneous urticaria or gastrointestinal complaints (GICs) or diseases secondary to parasites/infections other than HP/ drug hypersensitivity
1400	Disesase/s different from spontaneous urticaria or gastrointestinal complaints (GICs) or diseases secondary to parasites/infections other than HP/ drug hypersensitivity
1401	Disesase/s different from spontaneous urticaria or gastrointestinal complaints (GICs) or diseases secondary to parasites/infections other than HP/ drug hypersensitivity
1402	Disesase/s different from spontaneous urticaria or gastrointestinal complaints (GICs) or diseases secondary to parasites/infections other than HP/ drug hypersensitivity
1403	Disesase/s different from spontaneous urticaria or gastrointestinal complaints (GICs) or diseases secondary to parasites/infections other than HP/ drug hypersensitivity
1404	Disesase/s different from spontaneous urticaria or gastrointestinal complaints (GICs) or diseases secondary to parasites/infections other than HP/ drug hypersensitivity
1405	Disesase/s different from spontaneous urticaria or gastrointestinal complaints (GICs) or diseases secondary to parasites/infections other than HP/ drug hypersensitivity
1406	Disesase/s different from spontaneous urticaria or gastrointestinal complaints (GICs) or diseases secondary to parasites/infections other than HP/ drug hypersensitivity
1407	Disesase/s different from spontaneous urticaria or gastrointestinal complaints (GICs) or diseases secondary to parasites/infections other than HP/ drug hypersensitivity
1408	Disesase/s different from spontaneous urticaria or gastrointestinal complaints (GICs) or diseases secondary to parasites/infections other than HP/ drug hypersensitivity
1409	Disesase/s different from spontaneous urticaria or gastrointestinal complaints (GICs) or diseases secondary to parasites/infections other than HP/ drug hypersensitivity
1410	Disesase/s different from spontaneous urticaria or gastrointestinal complaints (GICs) or diseases secondary to parasites/infections other than HP/ drug hypersensitivity
1411	Disesase/s different from spontaneous urticaria or gastrointestinal complaints (GICs) or diseases secondary to parasites/infections other than HP/ drug hypersensitivity
1412	Disesase/s different from spontaneous urticaria or gastrointestinal complaints (GICs) or diseases secondary to parasites/infections other than HP/ drug hypersensitivity
1413	Disesase/s different from spontaneous urticaria or gastrointestinal complaints (GICs) or diseases secondary to parasites/infections other than HP/ drug hypersensitivity
1414	Disesase/s different from spontaneous urticaria or gastrointestinal complaints (GICs) or diseases secondary to parasites/infections other than HP/ drug hypersensitivity
1415	Disesase/s different from spontaneous urticaria or gastrointestinal complaints (GICs) or diseases secondary to parasites/infections other than HP/ drug hypersensitivity
1416	Disesase/s different from spontaneous urticaria or gastrointestinal complaints (GICs) or diseases secondary to parasites/infections other than HP/ drug hypersensitivity
1417	Disesase/s different from spontaneous urticaria or gastrointestinal complaints (GICs) or diseases secondary to parasites/infections other than HP/ drug hypersensitivity
1418	Disesase/s different from spontaneous urticaria or gastrointestinal complaints (GICs) or diseases secondary to parasites/infections other than HP/ drug hypersensitivity
1419	Disesase/s different from spontaneous urticaria or gastrointestinal complaints (GICs) or diseases secondary to parasites/infections other than HP/ drug hypersensitivity
1420	Disesase/s different from spontaneous urticaria or gastrointestinal complaints (GICs) or diseases secondary to parasites/infections other than HP/ drug hypersensitivity
1421	Disesase/s different from spontaneous urticaria or gastrointestinal complaints (GICs) or diseases secondary to parasites/infections other than HP/ drug hypersensitivity
1422	Disesase/s different from spontaneous urticaria or gastrointestinal complaints (GICs) or diseases secondary to parasites/infections other than HP/ drug hypersensitivity
1423	Disesase/s different from spontaneous urticaria or gastrointestinal complaints (GICs) or diseases secondary to parasites/infections other than HP/ drug hypersensitivity
1424	Disesase/s different from spontaneous urticaria or gastrointestinal complaints (GICs) or diseases secondary to parasites/infections other than HP/ drug hypersensitivity
1425	Disesase/s different from spontaneous urticaria or gastrointestinal complaints (GICs) or diseases secondary to parasites/infections other than HP/ drug hypersensitivity
1426	Disesase/s different from spontaneous urticaria or gastrointestinal complaints (GICs) or diseases secondary to parasites/infections other than HP/ drug hypersensitivity
